1 **Title: Temperature and O<sub>2</sub>, but not CO<sub>2</sub>, interact to affect aerobic performance**  
2 **of European sea bass (*Dicentrarchus labrax*)**

3 **Running title: Temperature & O<sub>2</sub>, not CO<sub>2</sub>, affect bass**

4 Daniel W. Montgomery<sup>a\*</sup>, Stephen D. Simpson<sup>a</sup>, William Davison<sup>a</sup>, Harriet R.  
5 Goodrich<sup>ab</sup>, Georg H. Engelhard<sup>cd</sup>, Silvana N.R. Birchenough<sup>c</sup>, Rod W. Wilson<sup>a\*</sup>

6 \*co-corresponding authors – [danwmont@gmail.com](mailto:danwmont@gmail.com) (+44 (0)7939598464),  
7 [R.W.Wilson@exeter.ac.uk](mailto:R.W.Wilson@exeter.ac.uk) (+44 (0) 1392 724652)

8 <sup>a</sup> Biosciences Department, College of Life and Environmental Sciences, University of  
9 Exeter, EX4 4QD, UK

10 <sup>b</sup> School of Biological Sciences, The University of Queensland, Brisbane, Qld 4072,  
11 Australia

12 <sup>c</sup> Centre for Environment, Fisheries & Aquaculture Science (Cefas), Pakefield Road,  
13 Lowestoft, NR33 0HT, UK

14 <sup>d</sup> School of Environmental Sciences, University of East Anglia, Norwich, NR4 7TJ,  
15 UK

16

17

18

19

20

21

## 22 **Abstract**

23 Climate change causes warming, decreased O<sub>2</sub>, and increased CO<sub>2</sub> in marine  
24 systems and responses of organisms will depend on interactive effects between  
25 these factors. We provide the first experimental assessment of the interactive effects  
26 of warming (14 to 22°C), reduced O<sub>2</sub> (~3 – 21 kPa O<sub>2</sub>), and increased CO<sub>2</sub> (~400 or  
27 ~1000 µatm ambient CO<sub>2</sub>) on four indicators of aerobic performance (standard  
28 metabolic rate, SMR, maximum metabolic rate, MMR, aerobic scope, and hypoxia  
29 tolerance, O<sub>2crit</sub>), blood chemistry, and O<sub>2</sub> transport (P<sub>50</sub>) of a marine fish, the  
30 European sea bass (*Dicentrarchus labrax*). Warming increased SMR and O<sub>2crit</sub> (i.e.  
31 reduced hypoxia tolerance) as well as MMR in normoxia but there was an interactive  
32 effect with O<sub>2</sub> so that hypoxia caused larger reductions in MMR and aerobic scope at  
33 higher temperatures. Increasing CO<sub>2</sub> had minimal effects on SMR, MMR and O<sub>2crit</sub>  
34 and did not show interactive effects with temperature or O<sub>2</sub> for any measured  
35 variables. Aerobic performance was not linked to changes in blood chemistry or P<sub>50</sub>.  
36 Despite lack of effects of CO<sub>2</sub> on aerobic performance, increased CO<sub>2</sub> induced 30%  
37 mortality of fish exercised in low O<sub>2</sub> at 22°C indicating important threshold effects  
38 independent of aerobic performance. Overall, our results show temperature and O<sub>2</sub>,  
39 but not CO<sub>2</sub>, interact to affect aerobic performance of sea bass, disagreeing with  
40 predictions of the oxygen- and capacity-limited thermal tolerance hypothesis.

## 41 1. Introduction

42 Atmospheric CO<sub>2</sub> levels are increasing and could reach ~1000 µatm by the end  
43 of the century (IPCC, 2014). Rising atmospheric greenhouse gases increase ocean  
44 temperatures (Bopp et al., 2013), which reduces oceanic O<sub>2</sub> content and  
45 exacerbates the frequency and severity of hypoxic (low O<sub>2</sub>) events (Breitburg et al.,

46 2018; Diaz & Rosenberg, 2008). As atmospheric CO<sub>2</sub> levels continue to rise so too  
47 does the concentration of CO<sub>2</sub> in marine systems (Caldeira & Wickett, 2003).  
48 Therefore, responses of marine organisms to climate change will be a result of  
49 simultaneous changes in temperature, O<sub>2</sub>, and CO<sub>2</sub>.

50 Changes in temperature, O<sub>2</sub>, and CO<sub>2</sub> can individually impact physiological  
51 performance of fish. Concern has been raised that interactions between these three  
52 may occur in a non-linear manner, so that their combined impact cannot be predicted  
53 from responses to an individual variable (Côté et al., 2016; Crain et al., 2008;  
54 McBryan et al., 2013; Todgham & Stillman, 2013). As such, we need to understand  
55 how temperature, O<sub>2</sub>, and CO<sub>2</sub> interact to affect the physiology of fish to enable  
56 accurate predictions of how climate change will influence fish species (Hollowed et  
57 al., 2013; Pörtner & Peck, 2010; Wernberg et al., 2012). One approach is to examine  
58 how these environmental factors affect the fish's range of aerobic metabolism  
59 (aerobic scope), defined as the difference between an animal's maximum rate of O<sub>2</sub>  
60 consumption (maximum metabolic rate, MMR) and the minimum rate needed to  
61 meet basal energy demands (standard metabolic rate, SMR) (Fry, 1971).

62 It has been proposed that aerobic scope provides a single metric of whole-animal  
63 performance in a particular environment. Therefore, aerobic scope can be directly  
64 linked to processes such as growth and reproduction and in turn overall organism  
65 fitness, through the concept of oxygen- and capacity- limited thermal tolerance,  
66 OCLTT (Pörtner, 2012; Pörtner et al., 2017). The OCLTT hypothesis assumes that  
67 an organism's overall fitness is maximised at an optimal temperature at which  
68 aerobic scope peaks. As such, anything that reduces aerobic scope will also  
69 diminish fitness, potentially changing the distribution of populations (Pörtner &  
70 Farrell, 2008). Hypoxia affects aerobic scope by limiting environmental O<sub>2</sub> availability

71 and, therefore, the maximum O<sub>2</sub> uptake rate possible by fish. Increased CO<sub>2</sub> has  
72 been proposed to affect aerobic scope both by increasing the SMR of fish (e.g.  
73 through increased cost of acid-base regulation) and by decreasing MMR (potentially  
74 because subsequent changes in internal acid-base chemistry can reduce O<sub>2</sub>  
75 transport capacity of the blood or impair tissue functioning). The OCLTT hypothesis  
76 therefore predicts that reduced O<sub>2</sub> and increased CO<sub>2</sub> will interact to reduce aerobic  
77 scope across the thermal performance curve of a species. This would result in a  
78 lower optimal temperature (where peak aerobic scope occurs) and reduced thermal  
79 tolerance. While this concept has been successfully used to explain changes in  
80 habitat suitability and population distributions of some fish species (Cucco et al.,  
81 2012; Del Raye & Weng, 2015), the assertion that it represents a universal  
82 framework to predict effects of climate change on all fish populations (Farrell, 2016)  
83 has been challenged (Jutfelt et al., 2018; Lefevre, 2016).

84 The proposal of the OCLTT hypothesis has led to numerous studies examining  
85 how O<sub>2</sub> or CO<sub>2</sub> interact with temperature to affect aerobic performance (for examples  
86 see Chabot and Claireaux, 2008; Rummer et al., 2013; Grans et al., 2014). However,  
87 to date no experimental work has sought to investigate how combined changes in all  
88 three factors (temperature, O<sub>2</sub>, and CO<sub>2</sub>) interact to affect aerobic performance in  
89 fish. Combining all three environmental variables is vital to accurately assess  
90 potential interactive effects for three reasons. Firstly, meta-analysis of multi-factor  
91 studies indicates that the prevalence of non-linear effects doubles when moving from  
92 studies that combine two factors to three factors (Crain et al., 2008). Secondly, the  
93 role of CO<sub>2</sub> as a limiting factor of aerobic scope was originally suggested to occur  
94 primarily in combination with hypoxia (Fry, 1971). Thirdly, low O<sub>2</sub> conditions in the  
95 environment always co-occur with increased CO<sub>2</sub> (Melzner et al., 2013). As such,

96 experiments investigating effects of O<sub>2</sub> or CO<sub>2</sub> and temperature on aerobic  
97 performance may not accurately reflect interactive effects caused by all three  
98 environmental factors.

99 In this study we investigated how temperature, O<sub>2</sub>, and CO<sub>2</sub> interact to affect  
100 aerobic performance of European sea bass (*Dicentrarchus labrax*), a species  
101 showing recent northward range expansions thought to be related to warming  
102 (Pawson et al., 2007). Two separate populations exist (Souche et al., 2015) and,  
103 although the physiological responses of this species to environmental change have  
104 been regularly examined, to date only one study has used fish from the Atlantic  
105 population. As such, our experiment had three aims:

- 106 i. to assess how aerobic performance of sea bass from the Atlantic population  
107 will respond to predicted future environmental changes;
- 108 ii. to determine whether combinations of hypoxia and increased CO<sub>2</sub> interact  
109 with temperature to affect aerobic scope, as predicted by the OCLTT  
110 hypothesis;
- 111 iii. to determine whether changes in aerobic performance are linked to blood  
112 chemistry and O<sub>2</sub> transport capacity.

## 113 2. Results

### 114 2.1. Standard metabolic rate and hypoxia tolerance

115 The best supported model for SMR included both temperature and CO<sub>2</sub> as fixed  
116 effects (Linear Mixed-Effects Model, marginal R<sup>2</sup> = 0.70, conditional R<sup>2</sup> = 0.70, Table  
117 S6). Standard metabolic rate approximately doubled between 14 and 22°C,  
118 exhibiting a Q<sub>10</sub> temperature coefficient of 2.09 (Figure 1). The best model indicated

119 that CO<sub>2</sub> had a small effect on SMR - reducing SMR by 7.4 mgO<sub>2</sub> kg<sup>-1</sup> h<sup>-1</sup>, ~10 % of  
120 the smallest SMR, (95 % CI = -1.65 to 16.43 mgO<sub>2</sub> kg<sup>-1</sup> h<sup>-1</sup>) across all temperatures at  
121 ~1000 μatm CO<sub>2</sub> (Figure 1). However, the model including temperature but not CO<sub>2</sub>  
122 had a ΔAICc <2 indicating that including the effect of CO<sub>2</sub> in the best model did not  
123 lead to a large improvement in model fit (Table S5). There was no evidence of an  
124 interactive effect between increasing temperatures and increasing CO<sub>2</sub>.

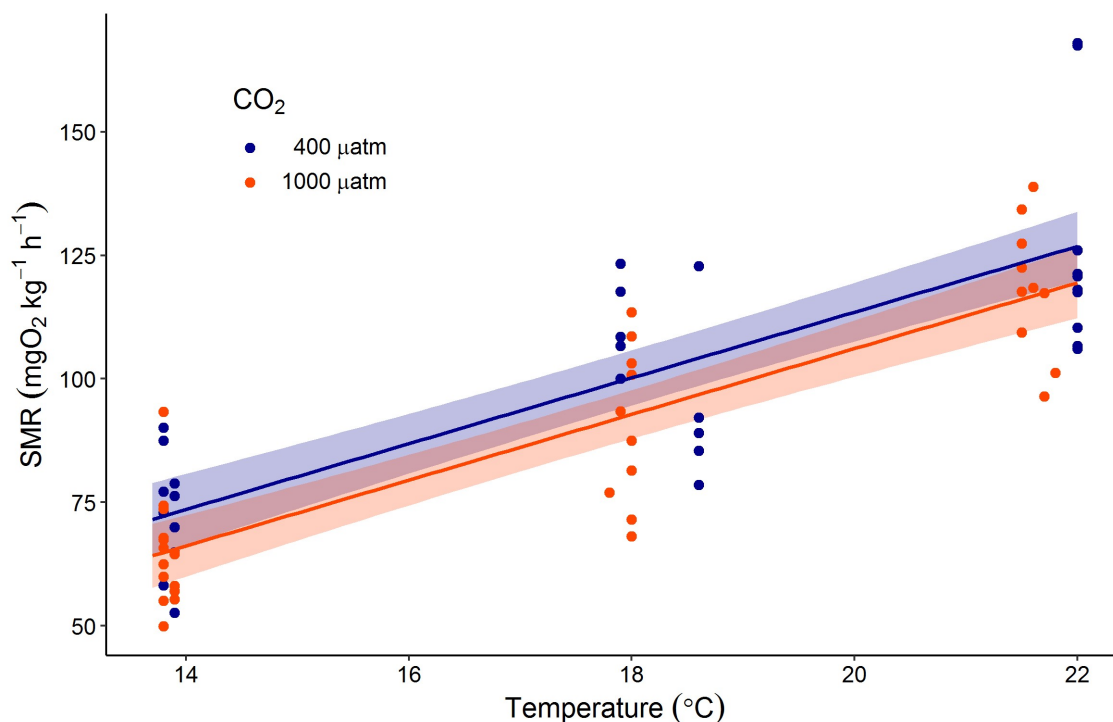

125

126 **Figure 1:** Impact of temperature and CO<sub>2</sub> on standard metabolic rates (SMR) of  
127 juvenile sea bass. The best supported model (marginal R<sup>2</sup> = 0.70, conditional R<sup>2</sup> =  
128 0.70) to explain variation in SMR included temperature and CO<sub>2</sub> as explanatory  
129 variables but not their interaction. Points represent calculated SMR for individual fish,  
130 lines represented predicted SMR at two CO<sub>2</sub> levels (blue = present day ~400 μatm  
131 CO<sub>2</sub>, orange = end of century ~ 1000 μatm CO<sub>2</sub>) from the best supported model, and  
132 shaded areas represent bootstrapped 95 % CI of predictions (n = 1000).

133 The best supported model of  $O_{2crit}$  included the effects of temperature,  $CO_2$  and  
134 SMR but no interactions (Linear Mixed-Effects Model, marginal  $R^2 = 0.72$ , conditional  
135  $R^2 = 0.77$ , Table S7). A doubling in SMR from 60 to 120  $mgO_2 kg^{-1} h^{-1}$  is predicted to  
136 increase  $O_{2crit}$  by 2.16 kPa  $O_2$  (95 % CI = 1.66 to 2.66 kPa  $O_2$ ). Independent of their  
137 effects on SMR, both temperature and  $CO_2$  were included in the best model of  $O_{2crit}$ .  
138 The effect of temperature meant that for a given value of SMR  $O_{2crit}$  would reduce as  
139 temperature increased. For instance, a fish at 14 °C is predicted to have an  $O_{2crit}$   
140 0.50 kPa  $O_2$  (95 % CI = 0.13 to 0.87 kPa  $O_2$ ) higher than a fish with the same SMR  
141 at 18 °C (Figure 2A). Combined the effects of SMR and temperature mean warming  
142 from 14 to 22 °C will increase  $O_{2crit}$  by 0.91 kPa  $O_2$  (95 % CI = 0.53 to 1.29 kPa  $O_2$ ,  
143 Figure 2B). The additional effect of  $CO_2$  is predicted to increase  $O_{2crit}$ . Despite this,  
144 when taking into account the effect of  $CO_2$  on SMR from the best model of SMR  
145 (Figure 1), and the effect of SMR and temperature on  $O_{2crit}$ , the resulting effect of  
146  $CO_2$  causes an increase in  $O_{2crit}$  of only 0.04 kPa  $O_2$  (95 % CI = -0.32 to 0.40 kPa  
147  $O_2$ , Figure 2B).

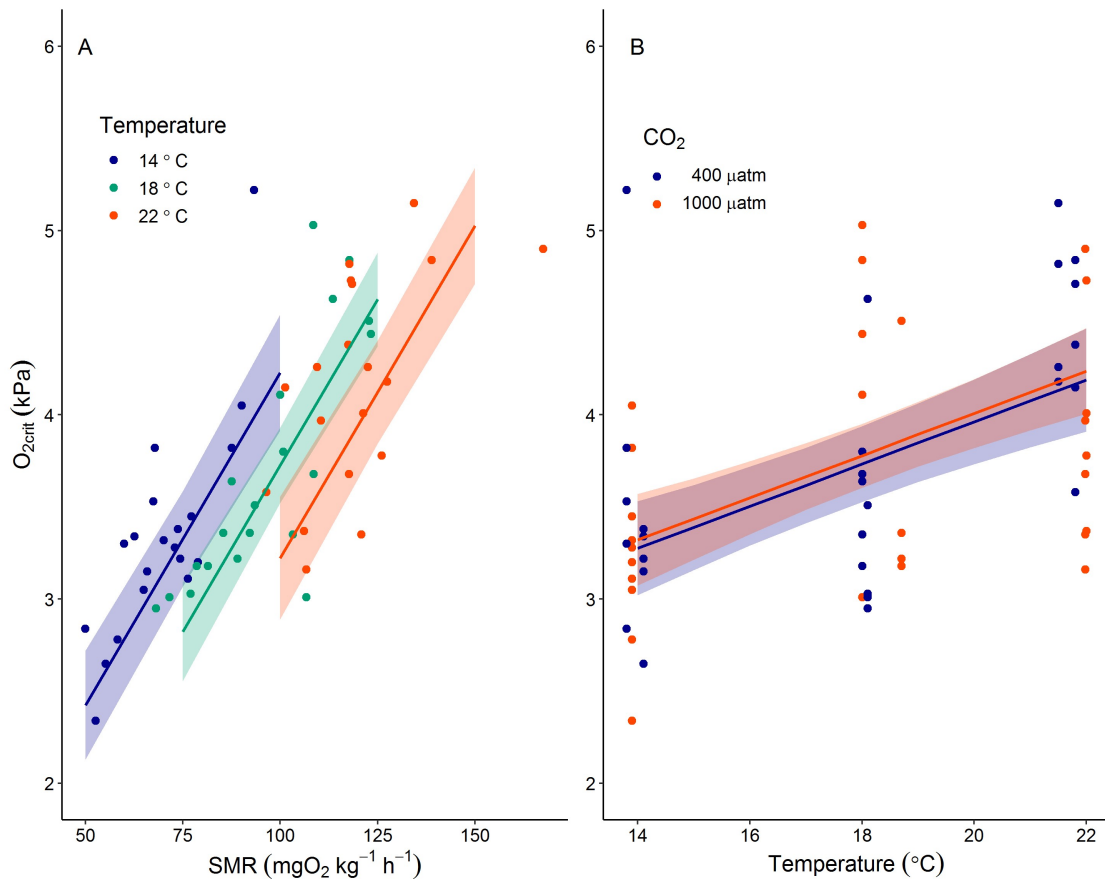

148

149 **Figure 2:** Combined impacts of SMR, temperature and  $CO_2$  on hypoxia tolerance  
150 ( $O_{2crit}$ ) of juvenile European sea bass. **A.** The best supported model (marginal  $R^2 =$   
151 0.72, conditional  $R^2 = 0.77$ ) predicted a positive effect of increasing SMR on  $O_{2crit}$   
152 with the effect of increased temperature resulting in lower  $O_{2crit}$  for a given value of  
153 SMR. **B.** Combined effects of SMR and temperature result in an increase in  $O_{2crit}$   
154 between 14 °C and 22 °C. The predicted positive effect of increased  $CO_2$  on  $O_{2crit}$  is  
155 small compared to changes in SMR and temperature. Points represent calculated  
156  $O_{2crit}$  for individual fish, lines represented predicted  $O_{2crit}$  from the best supported  
157 model, and shaded areas represent bootstrapped 95 % CI of predictions ( $n = 1000$ ).

## 158 2.2. Maximum metabolic rate and aerobic scope

159 Maximum metabolic rate of sea bass was affected by temperature,  $O_2$ , and  $CO_2$   
160 level. Warming from 14 to 22 °C, in normoxia combined with normocapnia, caused a



161 50 % increase in MMR from  $293.5 \pm 10.4$  to  $435.9 \pm 18.9$   $\text{mgO}_2 \text{ kg}^{-1} \text{ h}^{-1}$ , with a  $Q_{10}$  of  
162 1.64. In high  $\text{CO}_2$  the temperature effect on MMR was very similar ( $Q_{10} = 1.60$ ). The  
163 best supported model predicted that  $\text{O}_2$  had a non-linear quadratic effect on MMR,  
164 so that a given reduction in  $\text{O}_2$  caused a larger reduction in MMR at lower  $\text{O}_2$  levels,  
165 as well as interactive effects between  $\text{O}_2$  and temperature (Figure 3; Linear Mixed  
166 Model, marginal  $R^2 = 0.91$ , conditional  $R^2 = 0.96$ , Table S8). For example a 5 kPa  
167 reduction in  $\text{O}_2$  at 18 °C (in normal  $\text{CO}_2$ ) from air saturated levels (~ 20 to ~15 kPa  
168  $\text{O}_2$ ) results in a predicted decrease in MMR of  $8.0 \text{ mgO}_2 \text{ kg}^{-1} \text{ h}^{-1}$  (95 % CI = -7.2 to  
169  $23.2 \text{ mgO}_2 \text{ kg}^{-1} \text{ h}^{-1}$ ) whereas the same reduction in  $\text{O}_2$  from 10 to 5 kPa resulted in a  
170 15-fold larger predicted decrease in MMR of  $123.8 \text{ mgO}_2 \text{ kg}^{-1} \text{ h}^{-1}$  (95 % CI = 115.1 to  
171  $132.5 \text{ mgO}_2 \text{ kg}^{-1} \text{ h}^{-1}$ ). In addition, the non-linear  $\text{O}_2$  effect interacted with the  
172 temperature effect so that the same reduction in  $\text{O}_2$  caused a larger reduction in  
173 MMR as temperature increased (Figure 3A & B). This was particularly noticeable  
174 between 15 and 10 kPa  $\text{O}_2$  where fish at 22 °C (in normal  $\text{CO}_2$ ) exhibited a predicted  
175 decline in MMR that was 60 % larger than fish at 14 °C,  $80.9 \text{ mgO}_2 \text{ kg}^{-1} \text{ h}^{-1}$  (95 % CI  
176 =  $63.2$  to  $98.6 \text{ mgO}_2 \text{ kg}^{-1} \text{ h}^{-1}$ ) versus  $50.8 \text{ mgO}_2 \text{ kg}^{-1} \text{ h}^{-1}$  (95 % CI =  $35.9$  to  $65.7 \text{ mgO}_2$   
177  $\text{kg}^{-1} \text{ h}^{-1}$ ). Finally, environmental  $\text{CO}_2$  level had a small, negative effect independent of  
178 interactions between temperature and  $\text{O}_2$ . As a result, an increase in  $\text{CO}_2$  of 1000  
179  $\mu\text{atm}$  is predicted to reduce MMR by  $8.5 \text{ mgO}_2 \text{ kg}^{-1} \text{ h}^{-1}$  (95 % CI = -18.2 to  $35.3 \text{ mgO}_2$   
180  $\text{kg}^{-1} \text{ h}^{-1}$ ) irrespective of temperature and  $\text{O}_2$  (Figure 3C, D, & E).

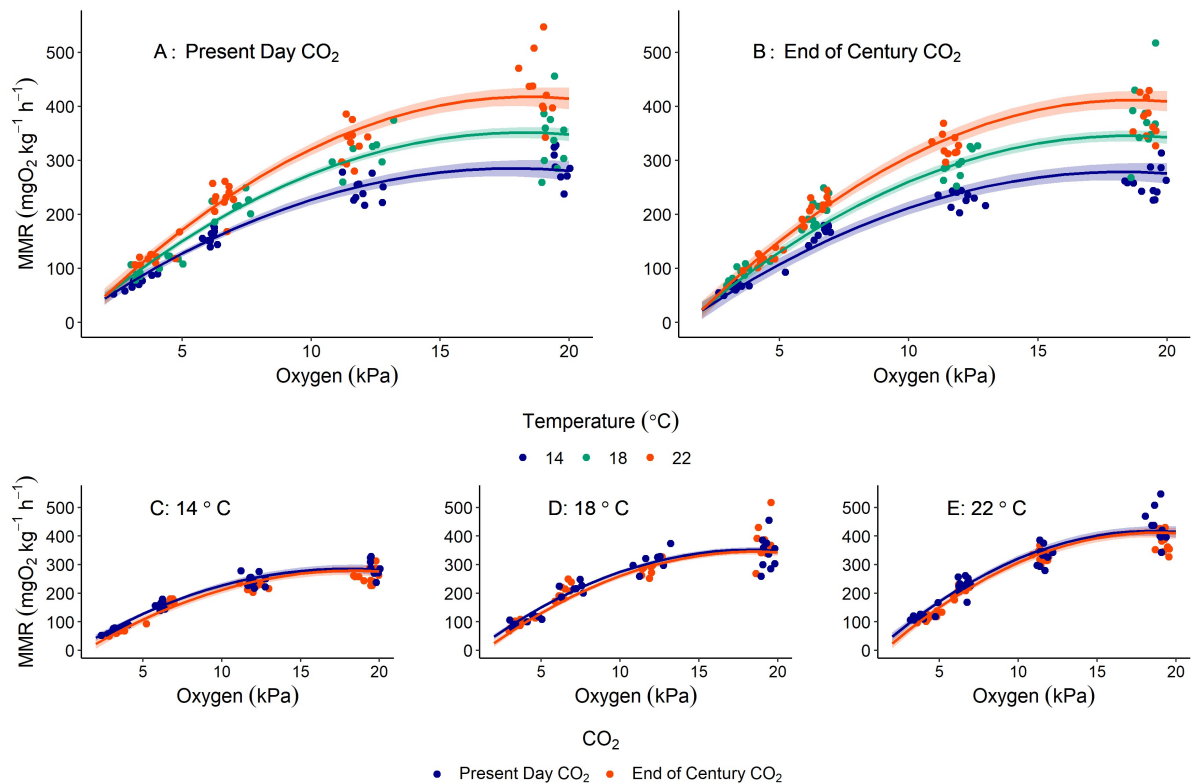

181

182 **Figure 3:** Effects of combinations of temperature, O<sub>2</sub>, and CO<sub>2</sub> on the maximum  
183 metabolic rate (MMR) of European sea bass. There was a synergistic interactive  
184 effect of temperature and O<sub>2</sub> on MMR for sea bass exposed to both **A.** present day  
185 CO<sub>2</sub> conditions (present day CO<sub>2</sub> = 400 μatm at ~20 kPa O<sub>2</sub>) and **B.** end of century  
186 CO<sub>2</sub> conditions (end of century CO<sub>2</sub> = 1000 μatm at ~ 20 kPa O<sub>2</sub>). The additive  
187 effects of reduced O<sub>2</sub> and increased CO<sub>2</sub> levels are displayed for sea bass at **A.** 14  
188 °C **B.** 18 °C and **C.** 22 °C. Points represent calculated MMR for individual fish, lines  
189 represent predicted MMR from the best supported model, and shaded areas  
190 represent bootstrapped 95 % confidence intervals (n = 1000).

191 We predicted the impacts of temperature, O<sub>2</sub>, and CO<sub>2</sub> on aerobic scope from the  
192 best supported models fitted to measurements of SMR and MMR (Figure 4). At  
193 normoxia (~20 kPa O<sub>2</sub>) aerobic scope is predicted to increase by 80.2 mgO<sub>2</sub> kg<sup>-1</sup> h<sup>-1</sup>  
194 (95 % CI = 24.8 to 135.7 mgO<sub>2</sub> kg<sup>-1</sup> h<sup>-1</sup>) as temperature increases from 14 to 22 °C

195 independent of changes in CO<sub>2</sub> level (Figure 4A & B). Interactive effects between  
196 temperature and O<sub>2</sub> on MMR are reflected in predictions of aerobic scope (Figure 4A  
197 &B). As increasing CO<sub>2</sub> has the same direction of effect on both SMR and MMR the  
198 impact of CO<sub>2</sub> on aerobic scope is minimal (Figure 4C, D, & E).

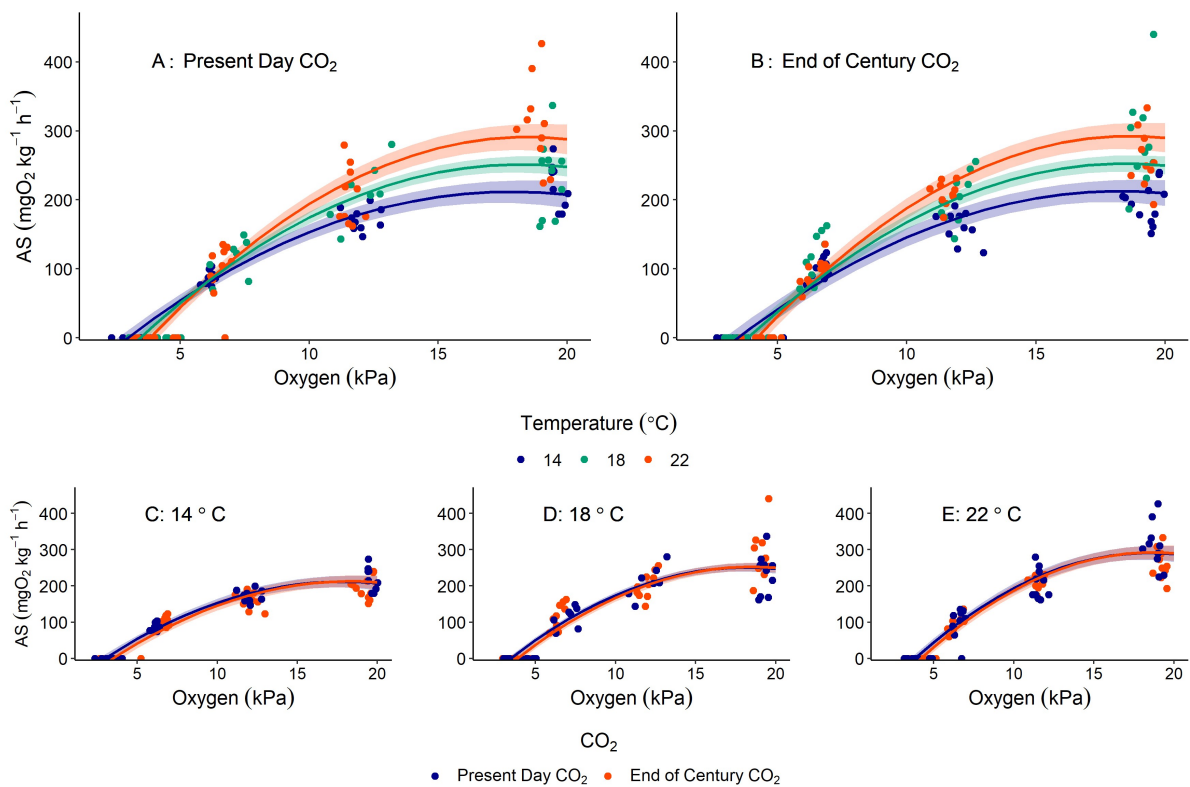

199

200 **Figure 4:** Effects of combinations of temperature, O<sub>2</sub>, and CO<sub>2</sub> on the aerobic scope  
201 (AS) of European sea bass. There was a non-linear interactive effect of temperature  
202 and O<sub>2</sub> on aerobic scope for sea bass exposed to both **A.** present day CO<sub>2</sub>  
203 conditions (present day CO<sub>2</sub> = 400 μatm at ~20 kPa O<sub>2</sub>) and **B.** end of century CO<sub>2</sub>  
204 conditions (end of century CO<sub>2</sub> = 1000 μatm at ~ 20 kPa O<sub>2</sub>). The additive effects of  
205 reduced O<sub>2</sub> and increased CO<sub>2</sub> levels are displayed for sea bass at **A.** 14 °C **B.** 18  
206 °C and **C.** 22 °C. Points represent aerobic scope of individual fish derived from  
207 calculated RMR and MMR of that individual, lines represent predicted aerobic scope  
208 calculated by subtracting model predictions of RMR and MMR and shaded areas

209 represent 95 % confidence intervals calculated from bootstrapped standard errors of  
210 predicted RMR and MMR (n = 1000).

### 211 2.3. Blood chemistry & Hb-O<sub>2</sub> affinity

212 Increasing ambient CO<sub>2</sub> from ~400 to ~1000  $\mu$ atm increased plasma pCO<sub>2</sub> (Two-  
213 way ANOVA, F = 15.84, df = 1, p < 0.001) whereas warming from 14 to 22 °C did not  
214 (F = 0.772, df = 2, p = 0.468), and there was no interactive effect noted (F = 2.067, df  
215 = 2, p = 0.138). Despite the significant overall effect of increased CO<sub>2</sub> on plasma  
216 pCO<sub>2</sub> pairwise comparisons (Figure 5) only revealed a significant increase in plasma  
217 pCO<sub>2</sub> in bass at 18 °C exposed to ~1000  $\mu$ atm ( $0.53 \pm 0.05$  kPa pCO<sub>2</sub>) compared to  
218 ambient conditions ( $0.29 \pm 0.05$  kPa pCO<sub>2</sub>) (Pairwise comparisons of least square  
219 means, t = 3.688, df = 1, p = 0.008).

220 To compensate for increased plasma pCO<sub>2</sub> in ~1000  $\mu$ atm CO<sub>2</sub> treatments sea  
221 bass accumulated ~3 mM extra HCO<sub>3</sub><sup>-</sup> (Two-way ANOVA, F = 44.34, df = 1, p <<  
222 0.001) (Figure 5), compared to fish in ambient CO<sub>2</sub> conditions at 14 and 18 °C. Fish  
223 exposed to ~1000  $\mu$ atm CO<sub>2</sub> at 22 °C showed a non-significant increase in HCO<sub>3</sub><sup>-</sup> of  
224 just under 2 mM (95 % CI = 0.60 to 2.84 mM) when compared to fish at ~400  $\mu$ atm  
225 CO<sub>2</sub> (t = 2.66, df = 1, p = 0.103). There was no temperature effect on plasma HCO<sub>3</sub><sup>-</sup>  
226 (F = 2.538, df = 2, p = 0.0903) and no interactive effect between temperature and  
227 CO<sub>2</sub> (F = 0.969, df = 2, p = 0.387).

228 As a result of compensatory accumulation of HCO<sub>3</sub><sup>-</sup>, blood extracellular pH (pH<sub>e</sub>)  
229 was regulated in response to high CO<sub>2</sub> (F = 3.56, df = 1, p = 0.066) and sea bass did  
230 not show significant effects of temperature on pH<sub>e</sub> (Two way ANOVA, F = 1.425, df =  
231 2, p = 0.251). However, there was a significant interactive effect between  
232 temperature and CO<sub>2</sub> (F = 3.952, df = 2, p = 0.026). This interactive effect was

233 caused by a significant reduction in  $\text{pH}_e$  in sea bass exposed to  $\sim 1000 \mu\text{atm CO}_2$  at  
234  $18 \text{ }^\circ\text{C}$  ( $7.80 \pm 0.03$ ) when compared to fish at ambient  $\text{CO}_2$  levels ( $7.97 \pm 0.04$ )  
235 (pairwise comparisons of least square means,  $t = 3.242$ ,  $\text{df} = 1$ ,  $p = 0.026$ ). We did  
236 not find significant differences between  $\text{pH}_e$  across all other treatment groups.  
237 Additionally, intracellular pH of red blood cells ( $\text{pH}_i$ ) showed no significant differences  
238 between all treatments (Kruskal-Wallis test,  $\chi^2 = 6.79$ ,  $\text{df} = 5$ ,  $p = 0.237$ ) (Figure 5).

239 There were no significant differences in plasma lactate levels across all  
240 treatments (Kruskal-Wallis,  $\chi^2 = 6.40$ ,  $\text{df} = 5$ ,  $p = 0.269$ ), with mean lactate for all fish  
241 of  $0.42 \pm 0.06 \text{ mM}$  ( $\pm \text{S.E.}$ ). Plasma glucose levels (mean for all fish of  $4.30 \pm 0.14$   
242  $\text{mM}$ ,  $\pm \text{S.E.}$ ) were not significantly affected by temperature (Two-way ANOVA,  $F =$   
243  $0.864$ ,  $\text{df} = 2$ ,  $p = 0.429$ ),  $\text{CO}_2$  ( $F = 0.0138$ ,  $\text{df} = 1$ ,  $p = 0.907$ ) or the interaction  
244 between temperature and  $\text{CO}_2$  ( $F = 1.052$ ,  $\text{df} = 2$ ,  $p = 0.358$ ).

245

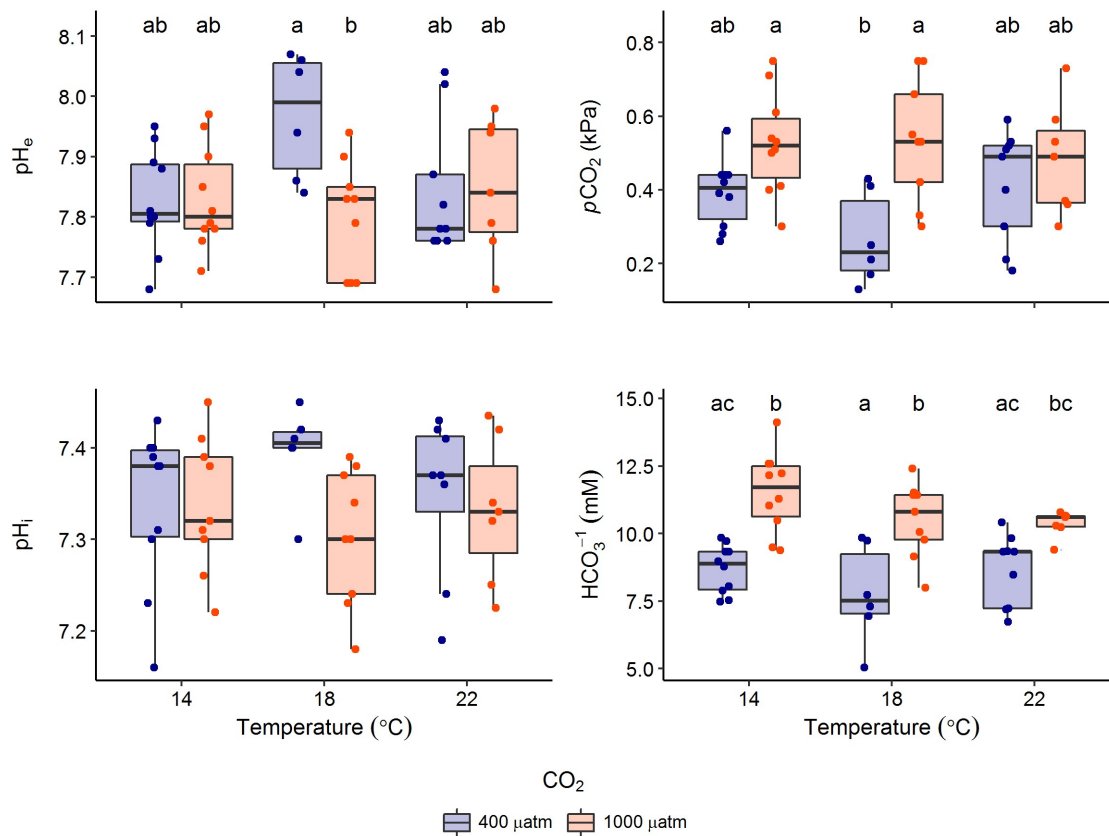

246

247 **Figure 5:** Impact of temperature and CO<sub>2</sub> on blood acid-base characteristics of  
 248 European sea bass. Significant differences in pairwise comparisons of least square  
 249 means between treatments are indicated by different letters (a,b,c). No significant  
 250 differences between any treatments were noted for measurements of pH<sub>i</sub>.

251 Our measurements of blood O<sub>2</sub> transport showed no consistent impacts of  
 252 temperature or CO<sub>2</sub>. Haemoglobin-O<sub>2</sub> binding affinity (P<sub>50</sub>) (Kruskal-Wallis,  $\chi^2 =$   
 253 6.503, df = 4, p = 0.165) and Hills' number (One-way ANOVA, F = 0.878, df = 4, p =  
 254 0.487) were not significantly different between any treatments (Figure S1).  
 255 Haematocrit (Hct) was not affected by temperature (Two-way ANOVA, F = 0.832, df  
 256 = 2, p = 0.442) or CO<sub>2</sub> (F = 2.945, df = 1, p = 0.093) and no interactive effects were  
 257 evident (F = 0.069, df = 2, p = 0.934). Haemoglobin (Hb) levels were affected by  
 258 temperature (Two-way ANOVA, F = 7.094, df = 2, p = 0.002) with fish sampled at 22  
 259 °C having Hb levels 0.20 and 0.24 mM higher than fish sampled at 18 and 14 °C

260 respectively. Haemoglobin levels were not affected by CO<sub>2</sub> ( $F = 0.690$ ,  $df = 1$ ,  $p =$   
261  $0.411$ ) and there were no interactive effects ( $F = 3.067$ ,  $df = 2$ ,  $p = 0.057$ ) (Figure  
262 S2).

#### 263 2.4. Mortality

264 Three fish (30 %) died ~1 hour post-chase after exposure to ~6 kPa O<sub>2</sub> at 22 °C  
265 in the high CO<sub>2</sub> treatment. No fish died post-chase in any other treatment  
266 combinations.

### 267 3. Discussion

268 Our results demonstrate, for the first time, the interactive effects of temperature,  
269 O<sub>2</sub>, and CO<sub>2</sub> on aerobic performance of an active predatory marine fish. We show  
270 that temperature and O<sub>2</sub> have a non-linear interactive effect on aerobic performance  
271 of European sea bass but CO<sub>2</sub>'s impact is minor and independent. Both SMR and  
272 MMR increased with temperature from 14 to 22 °C, but changes in MMR were  
273 greater leading to positive effects on absolute aerobic scope. These results suggest  
274 that European sea bass populations in the North-East Atlantic (typical temperatures  
275 are < 22 °C) could physiologically benefit from global warming. However, hypoxia  
276 tolerance reduced at higher temperatures, and hypoxia reduced MMR and aerobic  
277 scope by a greater amount at high temperatures, indicating that in warmer waters  
278 European sea bass will be more susceptible to hypoxia.

279 We confirm similar findings from previous research investigating effects of  
280 temperature and O<sub>2</sub> on European sea bass. For example, the increase in SMR with  
281 temperature we observed closely follows results from aquaculture sourced European  
282 sea bass (Claireaux & Lagardère, 1999). That is the Q<sub>10</sub> temperature coefficient  
283 dropped from 2.33 between 14 and 18 °C to 1.82 between 18 and 22 °C. This drop in

284 Q<sub>10</sub> as temperature increases provides further evidence that SMR does not increase  
285 exponentially after chronic vs acute exposure (Sandblom et al., 2014; Schulte et al.,  
286 2011). Responses of MMR to temperature showed similar Q<sub>10</sub>'s indicating a linear  
287 increase in MMR between 14 and 22 °C. This also closely corresponds with  
288 observations from Claireaux and Lagardère (1999) who found that MMR increased  
289 approximately linearly between 14 and 22 °C, before peaking between 22 and 24 °C  
290 and declining at higher temperatures. Further work with sea bass from  
291 Mediterranean stock has shown that specific growth rate and feed conversion  
292 efficiency peak at ~25 °C and decline at higher temperatures (Person-Le Ruyet et  
293 al., 2004), similar to changes in metabolic scope shown by Claireaux and Lagardère  
294 (1999). Finally, aquaculture-produced sea bass display an Arrhenius break point of  
295 heart rate at ~21.5 °C and developed arrhythmia at ~26 °C (Crespel et al., 2019).  
296 The consistency in temperature of peak performance in sea bass from distinct sub-  
297 populations with vastly different environmental experiences supports the idea that  
298 fish face ceilings to physiological performance in the face of environmental change  
299 (Sandblom et al., 2016). Despite these similarities with previous research, SMR of  
300 fish in our study was higher at a given temperature than for fish from Mediterranean  
301 stocks (Claireaux & Lagardère, 1999). This may support the theory of metabolic cold  
302 adaptation, that basal energy demand in fish from warmer environments will be lower  
303 than in fish from cold environments when measured at the same temperature  
304 (Krogh, 1916). This has recently been supported by evidence from wild populations  
305 of three-spine stickleback (*Gasterosteus aculeatus*) (Pilakouta et al., 2020).

306 Declining O<sub>2</sub> caused a decrease in MMR along a limiting oxygen curve, similar to  
307 that seen previously in sea bass (Claireaux & Lagardère, 1999; Lagardère et al.,  
308 1998) and other fish species (Chabot & Claireaux, 2008; Claireaux et al., 2000;



309 Lefrancois & Claireaux, 2003; Mallekh & Lagardère, 2002). This result questions  
310 recent predictions made by Seibel and Deutsch (2020) that MMR of fish should  
311 decrease linearly from ~21 kPa O<sub>2</sub> to O<sub>2crit</sub> values. The curved, rather than linear,  
312 response of MMR we observed may occur as a result of compensatory mechanisms  
313 (e.g. increased ventilation, cardiac output, gill lamellar perfusion and surface area,  
314 and haematocrit) to maintain O<sub>2</sub> delivery (Farrell & Richards, 2009). While these  
315 adjustments may limit reductions in MMR during mild to moderate hypoxia they may  
316 reach their performance limits as O<sub>2</sub> approaches critical levels, resulting in a steeper  
317 decline in MMR. For example, in moderate hypoxia rainbow trout (*Oncorhynchus*  
318 *mykiss*) increase cardiac output via increased stroke volume but in severe hypoxia  
319 cardiac output cannot be increased further leading to bradycardia (Sandblom &  
320 Axelsson, 2005).

321 Temperature and O<sub>2</sub> interacted to affect metabolism of sea bass so that impacts  
322 of hypoxia on MMR increased with temperature (Figure 3). This result supports  
323 previous research by Claireaux & Lagardère (1999). However, sea bass in our study  
324 displayed higher MMR at similar temperature and pO<sub>2</sub> when compared to bass from  
325 Claireaux and Lagardère (1999). In addition, the O<sub>2crit</sub> (the point at which SMR =  
326 MMR) of our sea bass increased between 14 °C and 22 °C (Figure 2) whereas  
327 results from previous work suggested that O<sub>2crit</sub> increases or remains constant  
328 across this temperature range (Claireaux & Lagardère, 1999). The reduction in  
329 hypoxia tolerance of sea bass with warming was primarily a result of strong positive  
330 correlation between O<sub>2crit</sub> and SMR (Figure 1). This relationship has been shown for  
331 numerous fish species, and most recently in work with black sea bass (*Centropristus*  
332 *striata*) (Slesinger et al., 2019). However, our results also indicate that temperature  
333 had a secondary effect which resulted in lower O<sub>2crit</sub> at higher temperatures for a

334 given SMR. This suggests that temperature affects  $O_{2crit}$  via another mechanism (or  
335 mechanisms) independent of SMR. This is unlikely to be related to  $O_2$  transport  
336 capacity of the blood as there were few consistent effects of temperature on Hct, Hb  
337 or  $P_{50}$  of sea bass (Figure 5, S1 and S2). It has previously been observed that  
338 improved hypoxia tolerance of fish after acclimation to increased temperature  
339 correlates to increased gill lamellar surface area (McBryan et al., 2016) or changes  
340 to heart structure (Anttila et al., 2015). Gomez Isaza *et al.* (2021) demonstrated that  
341 both of these cardiorespiratory responses can improve  $O_2$  supply capacity.  
342 Combined, these results suggest that thermal acclimation can cause structural  
343 changes to the gills and the heart, improving performance in low  $O_2$  conditions and  
344 mitigating the negative effect of temperature induced increases in SMR on hypoxia  
345 tolerance.

346 The independent effect of rising  $CO_2$  reduced MMR. Previous research has not  
347 shown consistent effects of  $CO_2$  on MMR or SMR of fish species, with the majority  
348 showing no effects of  $CO_2$  (Lefevre, 2016, 2019). Interestingly the most recent  
349 research with European sea bass found that long term exposure to elevated  $CO_2$   
350 increased MMR. This may indicate that negative effects of short term exposures  
351 used in our study (i.e. weeks) can be overcome in the long term (i.e. years) (Crespel  
352 et al., 2019). As such, future work needs to determine whether interactions between  
353  $CO_2$  and temperature or  $O_2$  occur over longer time scales. The effect of  $CO_2$  on  
354 metabolic rate in our study was only identifiable by including the rise in  $CO_2$  which  
355 co-occurs when environmental  $O_2$  declines. Without the additional data from  
356 increased  $CO_2$  exposures at lower  $O_2$  levels the effect of ambient  $CO_2$  on MMR at  
357 normoxia was not significant. Although the best model of SMR also included a  
358 negative effect of  $CO_2$  this was predicted to be small with confidence intervals

359 overlapping zero (Figure 1). Additionally, removal of CO<sub>2</sub> as an explanatory variable  
360 from the model of SMR did not greatly impair model fit ( $\Delta AICc < 2$ ) which indicates  
361 that the effect of CO<sub>2</sub> on SMR was not critically important for overall model  
362 performance.

363 As CO<sub>2</sub> increases in the environment when O<sub>2</sub> declines the negative effect of  
364 CO<sub>2</sub> has a greater impact on MMR at lower O<sub>2</sub> levels (Figure 3 C, D, and E).  
365 Decreased MMR when fish are exposed to acutely increased CO<sub>2</sub> is usually thought  
366 to be a result of an internal acidosis causing a decrease in Hb-O<sub>2</sub> binding affinity,  
367 reducing the capacity of O<sub>2</sub> transport in the blood (Heuer & Grosell, 2016). However,  
368 fish have well developed acid-base regulatory mechanisms and blood sampling  
369 showed that sea bass in normoxia had fully compensated for the effects of increased  
370 environmental CO<sub>2</sub> on blood pH by compensatory accumulation of extra HCO<sub>3</sub><sup>-</sup>,  
371 resulting in no changes in Hb-O<sub>2</sub> binding affinity (Figure 5 and S1). Additionally, we  
372 have recently shown that sea bass are able regulate blood pH when exposed to  
373 concurrent progressive hypercapnia during progressive hypoxia over the course of  
374 several hours and have higher Hb-O<sub>2</sub> binding affinity in these conditions when  
375 compared to fish exposed to progressive hypoxia with no concurrent hypercapnia  
376 (Montgomery et al., 2019). In addition, we did not see significant changes in Hb  
377 levels or Hct between CO<sub>2</sub> treatments (Figure 7). We conclude that the negative  
378 effect of increased CO<sub>2</sub> on MMR is unlikely to be related to changes in O<sub>2</sub> transport  
379 capacity in the blood. Whilst beyond the scope of the present study we can  
380 speculate that instead CO<sub>2</sub> may affect MMR via changes in mitochondrial  
381 metabolism (Leo et al., 2017; Strobel et al., 2012, 2013), cardiac performance  
382 (Crespel et al., 2019; Perry & Abdallah, 2012) or via shifts from aerobic to anaerobic  
383 metabolic pathways (Michaelidis et al., 2007). Indeed, recent results show that CO<sub>2</sub>

384 impacts mitochondrial function of sea bass from the Atlantic population in  
385 combination with acute warming (Howald et al., 2019)

386 While the effect of CO<sub>2</sub> on MMR was part of the best supported model it is  
387 uncertain whether it would cause biologically relevant impacts. Previous research  
388 has linked declines in MMR caused by increased CO<sub>2</sub> with decreased swimming  
389 performance (Lefevre, 2019) but it is unknown if the relatively small changes in MMR  
390 shown in the present study would translate to other aspects of whole animal  
391 performance. This is especially the case as predictions of aerobic scope from the  
392 combined best supported models of MMR and SMR essentially show no effect of  
393 CO<sub>2</sub> on aerobic scope at O<sub>2</sub> levels >10 kPa (Figure 4 C, D, and E). This occurs  
394 because predicted effects of CO<sub>2</sub> act in the same direction for both SMR and MMR.  
395 As changes in aerobic scope typically predict environmental impacts on processes  
396 such as growth and reproduction (Clark et al., 2013; Pörtner et al., 2017) we would  
397 predict that climate change relevant CO<sub>2</sub> increases have negligible effects on these  
398 endpoints. However, the effect of CO<sub>2</sub> may have important consequences not  
399 reflected in changes in aerobic scope. In our most extreme treatment (22 °C, ~30 %  
400 air saturation, end of century CO<sub>2</sub>) we observed 30 % mortality of sea bass after  
401 exhaustive exercise. Fish exercised at the same temperature and O<sub>2</sub> levels in  
402 ambient CO<sub>2</sub> conditions showed no mortality (and no mortality was observed in any  
403 other treatment combinations) – consequently it appears the elevated CO<sub>2</sub> during  
404 hypoxia in a future ocean scenario (which was approximately 1100 µatm higher than  
405 in the present day CO<sub>2</sub> scenario) may impair recovery from exercise when O<sub>2</sub> is  
406 limiting. Mortality in fish post-exercise has been theorised to result from intracellular  
407 acidosis generated during anaerobic respiration (Wood et al., 1983). Therefore, the  
408 greater increase in CO<sub>2</sub> during hypoxia in the future ocean CO<sub>2</sub> scenario may either

409 exacerbate the intracellular acidosis caused by anaerobic activity or impair the ability  
410 of fish to process anaerobic end products.

### 411 3.1. Evidence to support OCLTT?

412 The OCLTT hypothesis suggests climate change will affect fish because  
413 combined effects of reduced O<sub>2</sub> and increasing CO<sub>2</sub> will synergistically interact,  
414 lowering aerobic scope across its thermal performance curve (Pörtner & Peck,  
415 2010), and that changes in aerobic scope can be used as a single metric for  
416 predicting whole animal performance (Pörtner, 2012). Our data provides some  
417 support for the OCLTT hypothesis as the observed interactions between increased  
418 temperature and reduced O<sub>2</sub> on aerobic scope would be expected to result in  
419 changes to the thermal performance curve as predicted by Pörtner and Farrell  
420 (2008). However, our highest temperature treatment did not decrease MMR or  
421 aerobic scope and so we cannot confirm whether interactive effects between  
422 temperature and hypoxia would follow predictions of the OCLTT above the optimum  
423 temperature of aerobic scope. In contrast to hypoxia, the effects of CO<sub>2</sub> did not  
424 follow predictions from the OCLTT as CO<sub>2</sub> did not interact with either temperature or  
425 hypoxia and had minimal impacts on aerobic scope.

426 The interactive effects of O<sub>2</sub> and temperature on the MMR of sea bass in this  
427 study closely resemble predictions of the metabolic niche framework which Ern  
428 (2019) proposed as an update to the OCLTT hypothesis. In particular the concept of  
429 aerobic scope isopleths (where aerobic scope remains constant across a range of  
430 temperatures as a result of changes in O<sub>2</sub> or vice versa) is supported by our data,  
431 showing that aerobic scope of sea bass would be expected to remain constant  
432 across an 8 °C temperature range at an O<sub>2</sub> level of ~6 kPa (Figure 3 A and B). As

433 such, we would support Ern's suggestion to experimentally assess how aerobic  
434 scope affects important processes, such as growth, independently of changes in  
435 temperature and O<sub>2</sub> by utilising these isopleths. Although increased aerobic scope  
436 has long been linked to improved individual fitness there is a still a lack of evidence  
437 to confirm this relationship occurs – as such the assumption that peak physiological  
438 fitness occurs when aerobic scope peaks (central to the OCLTT) may be erroneous.

439 Alternatively, Deutsch *et al.* (2015) have suggested a framework which aims to  
440 predict impacts of climate change on the physiological suitability of a habitat for a  
441 species via a metabolic index, relating the ratio of O<sub>2</sub> supply to resting metabolic  
442 demand (i.e. SMR), rather than aerobic scope. This metabolic index appears to  
443 provide a tool for predicting the biogeographical distributions of species with the  
444 biogeographical distribution limits of many marine species corresponding to a  
445 metabolic index of ~2-5 (Deutsch *et al.*, 2015). This approach has been supported by  
446 experimental work with black sea bass, *Centropristis striata*, (Slesinger *et al.*, 2019)  
447 and Roman sea bream, *Chrysolephus laticeps*, (Duncan *et al.*, 2020) which showed  
448 that the metabolic index can accurately predict changes in population distributions of  
449 these species . Applying the principle of the metabolic index to our data suggests  
450 that temperatures of 22 °C are close to the upper temperature limits of European sea  
451 bass from the North-East Atlantic sub-population (metabolic index at 22 °C and 20  
452 kPa O<sub>2</sub> was ~5).

#### 453 4. Conclusion

454 In summary, our research shows that aerobic scope of European sea bass will  
455 increase with expected warming in the North-East Atlantic, and that even extreme  
456 summer temperatures (~22 °C) at the end of the century will positively impact on the

457 absolute aerobic performance of sea bass. However, synergistic interactions  
458 between warming and reduced O<sub>2</sub> indicate that hypoxic conditions will have greater  
459 impacts on sea bass in future oceans. Increased CO<sub>2</sub> levels showed no interactions  
460 with either temperature or O<sub>2</sub> changes but were predicted to cause a small decline in  
461 MMR – although this had little impact on aerobic scope because increased CO<sub>2</sub>  
462 caused a trend for decreased SMR. Sea bass fully compensated blood pH for  
463 increased CO<sub>2</sub> levels and increases in SMR and reductions in MMR with  
464 temperature were not linked to changes in O<sub>2</sub> transport. Despite end of century CO<sub>2</sub>  
465 levels having minimal effects on aerobic scope, they did cause increased mortality of  
466 fish recovering from exercise in the more extreme hypoxic scenario (~30 % air  
467 saturation) at 22 °C. This effect would not have been observed without including  
468 expected increases in CO<sub>2</sub> as O<sub>2</sub> declines in hypoxia treatments. Thus,  
469 environmentally relevant changes in CO<sub>2</sub> during hypoxia may lead to important  
470 threshold effects which could be missed if experiments only consider changes in  
471 CO<sub>2</sub> related to atmospheric concentrations. Interactive effects of temperature and O<sub>2</sub>  
472 support predictions from the oxygen-and temperature-limited metabolic niche  
473 framework proposed as an update to the OCLTT hypothesis by Ern (2019), however  
474 the effect of CO<sub>2</sub> did not support predictions of the OCLTT (Pörtner & Farrell, 2008).  
475 Changes in the metabolic index proposed as a physiological constraint by Deutsch *et*  
476 *al.* (2015) suggest that despite increases in MMR and aerobic scope future climate  
477 change may result in conditions which will begin to constrain growth and  
478 reproduction of sea bass in areas where temperatures increase above 22 °C.  
479 However, there is a vital need for increased research to link changes in aerobic  
480 scope to population relevant metrics such as growth and reproduction to better

481 assess what environmental impacts on aerobic performance may mean for wider  
482 populations.

## 483 5. Materials & Methods

### 484 5.1. Animal Collection and Husbandry

485 We collected juvenile sea bass from estuaries and coastal lagoons on the south  
486 Dorset coast and Isle of Wight in June 2017. Fish were held in a marine recirculating  
487 aquaculture system (RAS) at the University of Exeter for 332 days before  
488 experimental work began (see water chemistry data in Table 1). Sea bass were fed a  
489 diet of commercial pellet (Horizon 80, Skretting) at a ration of ~1-2 % body mass  
490 three times per week and supplemented with ~1 % body mass of chopped mussel  
491 (*Mytilus edulis*) once per week. All experimental procedures were carried out under a  
492 UK Home Office licence (P88687E07) and approved by the University of Exeter's  
493 Animal Welfare and Ethical Review Board.

494 **Table 1:** Water chemistry parameters of the recirculating aquaculture system in  
495 which sea bass were held prior to experimental work beginning (means  $\pm$  S.D.  
496 shown). Fish were initially held at 15 °C before stock systems were raised to 18 °C  
497 approximately 6 months prior to experimental work beginning. The temperature  
498 shown in the table represents the mean temperature for the entire time fish were  
499 held in the RAS prior to experimental trials beginning.

| <b>Time in<br/>system<br/>(days)</b> | <b>Temperature<br/>(°C)</b> | <b>pH<br/>(NBS<br/>scale)</b> | <b>Salinity</b> | <b>Total<br/>Alkalinity<br/>(<math>\mu</math>M)</b> | <b><math>p</math>CO<sub>2</sub><br/>(<math>\mu</math>atm)</b> |
|--------------------------------------|-----------------------------|-------------------------------|-----------------|-----------------------------------------------------|---------------------------------------------------------------|
| 332                                  | 17.1 $\pm$ 1.4              | 8.02 $\pm$ 0.05               | 32.98 $\pm$     | 2072.0 $\pm$                                        | 534.0 $\pm$                                                   |



---

0.65                      130.2                      60.2

---

500

501    5.2.    Treatment conditions

502            Sea bass were transferred to an experimental RAS, in a temperature-controlled  
503 room for a minimum of 14 days acclimation to treatment conditions (Figure 6). Six  
504 treatment conditions were used combining three temperatures and two CO<sub>2</sub> levels in  
505 a three x two factorial design (Table 2). Temperature treatments (14, 18 and 22 °C)  
506 were chosen to reflect temperature ranges in coastal UK waters from spring to  
507 autumn as well as potential future summer temperatures at the end of the century  
508 (IPCC, 2014; Tinker et al., 2020). CO<sub>2</sub> treatments (~400 & ~1000 µatm) were chosen  
509 to reflect annual average ambient atmospheric CO<sub>2</sub> levels currently and possible  
510 end-of-century ambient atmospheric levels according to an RCP 8.5 scenario (IPCC,  
511 2014). Sea bass were transferred to the experimental RAS at 18 °C before  
512 temperatures were adjusted at a rate of 2 °C per day to reach treatment conditions  
513 (i.e. 14 or 22 °C). A header tank (~500 L) in the experimental RAS was used to  
514 adjust CO<sub>2</sub> to the desired level for each treatment before entering the treatment tank  
515 which contained the sea bass. For present day CO<sub>2</sub> treatments (~400 µatm) the  
516 header tank was aerated using CO<sub>2</sub> scrubbed air to remove excess CO<sub>2</sub> added to  
517 the RAS by the biological filters. For end of century CO<sub>2</sub> treatments (~1000 µatm) an  
518 Aqua Medic pH computer was used to adjust RAS water to an appropriate pH (7.8).  
519 Additionally, treatment tanks were aerated with a gas mix with the appropriate CO<sub>2</sub>  
520 content for each treatment.

521            Measurements of treatment tank pH (NBS scale), salinity, temperature, and a 12  
522 mL water sample to measure Dissolved Inorganic Carbon (DIC) were taken every 2-

523 3 days. Seawater DIC analysis was conducted using a custom built system  
524 described in detail by Lewis *et al.* (2013). Data for pH, salinity, temperature and DIC  
525 were then input into the seawater carbon calculator programme, CO2SYS (Pierrot *et*  
526 *al.*, 2006) to calculate  $p\text{CO}_2$  based on the equilibration constants refitted by Dickson  
527 and Millero (1987), and  $\text{KSO}_4$  dissociation constants from Dickson (1990) (Table 2).

528 **Table 2:** Mean  $\pm$  S.D. of water chemistry parameters in treatment tanks during  
529 treatments at 3 temperature (14, 18, and 22 °C) and 2  $\text{CO}_2$  levels (~400 and ~1000  
530  $\mu\text{atm}$ ). Treatment order represents time course of treatments (i.e. treatment 1 was  
531 conducted first and treatment 6 last). Total Alkalinity (TA) varied somewhat over time  
532 as a result of biological activity and so was adjusted periodically by addition of 1.0 M  
533  $\text{NaHCO}_3$  to restore TA levels back to  $>2000 \mu\text{M}$ .

| Parameter                          | Treatment          |                    |                 |                 |                 |                    |
|------------------------------------|--------------------|--------------------|-----------------|-----------------|-----------------|--------------------|
|                                    | 1                  | 2                  | 3               | 4               | 5               | 6                  |
| Temperature<br>(°C)                | 17.9 $\pm$<br>0.0  | 22.0 $\pm$<br>0.0  | 13.9 $\pm$ 0.1  | 21.7 $\pm$ 0.5  | 13.9 $\pm$ 0.1  | 18.0 $\pm$<br>0.1  |
| $p\text{CO}_2$ ( $\mu\text{atm}$ ) | 460 $\pm$ 34       | 375 $\pm$ 28       | 333 $\pm$ 38    | 1065 $\pm$ 172  | 1057 $\pm$ 65   | 973 $\pm$<br>114   |
| pH (NBS)                           | 8.06 $\pm$<br>0.03 | 8.12 $\pm$<br>0.02 | 8.14 $\pm$ 0.04 | 7.79 $\pm$ 0.03 | 7.81 $\pm$ 0.04 | 7.83 $\pm$<br>0.05 |
| Salinity                           | 32.9 $\pm$<br>0.6  | 32.5 $\pm$<br>2.9  | 33.3 $\pm$ 0.3  | 32.6 $\pm$ 0.3  | 34.6 $\pm$ 0.5  | 33.8 $\pm$<br>0.6  |
| TA ( $\mu\text{M}$ )               | 1935 $\pm$<br>93   | 1745 $\pm$<br>26   | 1861 $\pm$ 88   | 2147 $\pm$ 292  | 2393 $\pm$ 188  | 2170 $\pm$<br>20   |

535 5.3. Respirometry measurements (SMR, MMR, and  $O_{2crit}$ )

536 Rates of oxygen consumption ( $\dot{M}O_2$ ) were made as a proxy of metabolic rate  
537 using an intermittent-flow respirometer system, details of which can be found in  
538 Montgomery *et al.* (2019), set-up following recommendations by Svendsen *et al.*  
539 (2016). Sea bass were starved for 72 hours prior to the start of measurements to  
540 ensure that metabolism was not affected by the specific dynamic action of digestion  
541 (Chabot *et al.*, 2016). Individual sea bass were then transferred to respirometer  
542 chambers and left to acclimate for a minimum of 12 hours overnight before  
543 measurements of  $\dot{M}O_2$  began. For each treatment all respirometry measurements  
544 were conducted in two groups (hereafter referred to as respirometry group), with five  
545 fish being measured simultaneously for each group. Following the 12 hour  
546 acclimation period we measured  $\dot{M}O_2$  of each sea bass for ~3-4 hours (from ~6 am  
547 to ~10 am) before hypoxia tolerance was assessed using a critical  $O_2$  tension ( $O_{2crit}$ )  
548 trial (Figure 6), following protocols set out in Montgomery *et al.* (2019). Carbon  
549 dioxide levels in the water were simultaneously increased as  $O_2$  declined during  $O_{2crit}$   
550 trials to reflect the natural rise in  $CO_2$  during hypoxic events in aquatic systems  
551 (Melzner *et al.*, 2013; Montgomery *et al.*, 2019). During  $O_{2crit}$  trials water pH,  
552 temperature, salinity, and DIC were measured every hour to calculate water  
553 carbonate chemistry. Changes in system  $pCO_2$  and pH during  $O_{2crit}$  trials for each  
554 treatment are given in supplementary materials (Table S1).

555  $O_{2crit}$  trials were stopped once a minimum of three consecutive  $\dot{M}O_2$   
556 measurements showed a transition from an oxy-regulating to oxy-conforming state  
557 for each fish. Following completion of  $O_{2crit}$  trials the respirometer system was  
558 aerated with ambient air ( $CO_2$  ~400  $\mu atm$ ) or a 0.1 %  $CO_2$  in air gas mix ( $CO_2$  ~1000  
559  $\mu atm$ ) to rapidly restore  $O_2$  levels to normoxia and  $CO_2$  to the appropriate treatment

560 level. Sea bass were left to recover in respirometers, for a minimum of one hour  
561 post-trial, until  $O_2$  levels reached  $\sim 21$  kPa  $O_2$  ( $\sim 100$  % air saturation) before  
562 removing the fish and measuring background respiration for a minimum of one hour  
563 (six measurement cycles) for all respirometers immediately post trial. Each sea bass  
564 was then placed in an individual  $\sim 10$  L isolation tank which was subsequently fed by  
565 the respirometry system sump (at a rate of  $\sim 4$  L  $\text{min}^{-1}$ ) to maintain treatment  
566 conditions (with overflowing water from the isolation tanks recirculating back to the  
567 sump).

568 After fish had rested overnight in isolation tanks, MMR was measured for each  
569 fish (using an exhaustive chase protocol; Norin and Clark, 2016) on three  
570 consecutive days (with overnight recovery in between) at three different levels of  $O_2$   
571 (100, 60 and 30 % air saturation) with increasing  $CO_2$  levels for each  $O_2$  level as  
572 detailed for  $O_{2\text{crit}}$  trials (Figure 6). The appropriate  $O_2$  and  $CO_2$  level was achieved by  
573 aerating isolation boxes with a mix of  $N_2$ ,  $O_2$  and  $CO_2$  (G400 Gas mixing system,  
574 Qubit Biology Inc.) at a rate of 5 L  $\text{min}^{-1}$ . Fish were exposed to the new  $O_2$  and  $CO_2$   
575 conditions for  $\sim 2$  hours before chase protocols were conducted. Chase protocols and  
576 subsequent respirometry measurements were conducted at the appropriate  
577 temperature,  $O_2$ , and  $CO_2$  conditions for each treatment. Measurements of water pH,  
578 temperature, salinity, and DIC were taken for each isolation tank, the chase tank  
579 (after all fish were chased) and the respirometer system (during  $\dot{M}O_2$  measurements)  
580 to calculate water carbonate chemistry. Temperature,  $O_2$ , and  $CO_2$  conditions for all  
581 MMR trials are given in Table S2.

582 For all  $\dot{M}O_2$  measurements dissolved  $O_2$  concentration (% air saturation) was  
583 measured continuously (frequency  $\sim 1$  Hz) in respirometer chambers using a fibre  
584 optic  $O_2$  optode mounted in the recirculation loop of the respirometer chamber.

585 These optodes were linked to two Firesting Optical Oxygen Meters (Pyro Science,  
586 Aachen, Germany) which were connected to a PC running AquaResp 3 software  
587 which automatically logged all measurements.

588  $\dot{M}O_2$  was automatically calculated by the AquaResp3 software by fitting a linear  
589 regression to the  $O_2$  versus time data for each measurement period. The slope ( $s$ ) of  
590 this regression ( $kPa O_2 h^{-1}$ ) was then used to calculate  $\dot{M}O_2$  ( $mg O_2 kg^{-1} h^{-1}$ ) using  
591 the equation outlined by Svendsen *et al.*(2016):

592

$$593 \quad \dot{M}O_2 = sV_{resp}\alpha m^{-1}$$

594

595 where  $V_{resp}$  is the respirometer volume minus the volume of the fish (L),  $\alpha$  is the  
596 solubility of  $O_2$  in water ( $mgO_2 L^{-1} kPa^{-1}$ ) for the relevant salinity and temperature,  
597 and  $m$  is the mass of the fish (kg). For the purpose of establishing the impacts of  
598 reduced  $O_2$  on MMR and determining  $O_{2crit}$  values, the  $O_2$  level of each  
599 measurement period was defined as the mean dissolved  $O_2$  measurement over the  
600 measurement period. The mean background respiration for each respirometer over  
601 the 1 hour post-trial measuring period (average was  $< 2\%$  of fish  $\dot{M}O_2$ ) was  
602 subtracted from  $\dot{M}O_2$  measurements. Background corrected  $\dot{M}O_2$  was then scaled to  
603 an average individual mass of 120 g using a mass exponent of 0.89 prior to  
604 subsequent analysis (Jerde *et al.*, 2019).

605 We calculated SMR of each fish as the mean of the lowest 10  $\dot{M}O_2$   
606 measurements from the ~3-4 hour period prior to  $O_{2crit}$  trials in which mean dissolved  
607  $O_2$  saturation was  $>80\%$  air saturation. The critical  $O_2$  tension ( $O_{2crit}$ ) of each  
608 individual fish was then calculated using  $\dot{M}O_2$  measurements from  $O_{2crit}$  trials with

609 function 'calcO2crit' from package 'fishMO2' (Chabot *et al.* 2016) in R v.3.6.3 (R  
610 Core Team, 2020), using the estimated SMR of each individual, as detailed in the  
611 supplementary material of Claireaux & Chabot (2016). Finally, we defined MMR as  
612 the single highest measurement of  $\dot{M}O_2$  in the one hour period immediately following  
613 exercise to exhaustion (Norin & Clark, 2016). This point usually occurred during the  
614 first measurement period immediately after each fish was moved to the respirometer  
615 chamber i.e. ~ 2-5 minutes after the cessation of the chase protocol. However, for  
616 some fish in normoxia spontaneous activity inside the respirometer chamber during  
617 SMR or  $O_{2crit}$  trials resulted in instantaneous measurements of  $\dot{M}O_2$  higher than  
618 those noted following chase protocols. In these occasions this higher value of  $\dot{M}O_2$   
619 was used as the estimated MMR for that fish (n = 2 out of 65 fish).

#### 620 5.4. Blood chemistry and Hb-O<sub>2</sub> affinity measurements

621 Following MMR measurements, sea bass were left overnight in the isolation  
622 boxes before blood samples were taken (Figure 6), following methods outlined in  
623 Montgomery *et al.* (2019), from each fish in normoxic conditions and at the relevant  
624 treatment temperature and CO<sub>2</sub> level (Table S3). We then measured extracellular pH  
625 (pH<sub>e</sub>), haematocrit (Hct), TCO<sub>2</sub>, haemoglobin content (Hb), plasma glucose, and  
626 plasma lactate and calculated  $pCO_2$  and HCO<sub>3</sub><sup>-</sup> following methods detailed in  
627 Montgomery *et al.* (2019). We also followed the freeze-and-thaw method to measure  
628 intracellular pH of RBCs (pH<sub>i</sub>) as described by Zeidler and Kim (1977), and validated  
629 by Baker *et al.* (2009). All measurements or storage of blood for subsequent analysis  
630 occurred within 10 minutes of blood sampling. Finally, we measured Hb-O<sub>2</sub> affinity  
631 using a Blood Oxygen Binding System (BOBS, Loligo systems), detailed in general  
632 in Oellermann *et al.* (2014) and specifically for fish blood in Montgomery *et al.*  
633 (2019).

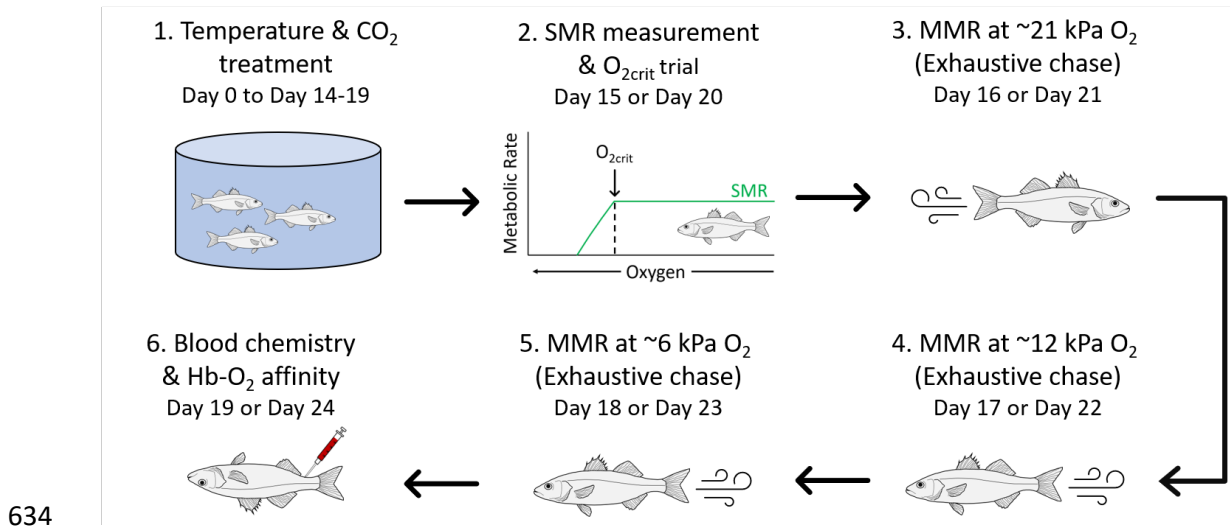

635 Figure 6: Summary of the timeline over which experimental end points were  
636 measured. Sea bass were acclimated for a minimum of 14 days to a temperature  
637 (14, 18, 22 °C) and CO<sub>2</sub> (~400 µatm or ~1000 µatm ambient CO<sub>2</sub>) treatment before  
638 measurements of SMR/O<sub>2crit</sub>, MMR (at ~21 kPa, ~12 kPa, and ~6 kPa O<sub>2</sub>), and blood  
639 chemistry/Hb-O<sub>2</sub> affinity were obtained on consecutive days for each individual.

## 640 5.5. Statistical Analysis

### 641 5.5.1. Respirometry data analysis

642 We conducted all statistical analysis in R v3.6.3 (R Core Team, 2020). Results  
643 are reported as mean ± S.E unless otherwise stated. Sample sizes for respirometry  
644 data can be seen in Table S4. The effects of temperature, O<sub>2</sub>, and CO<sub>2</sub> on individual  
645 physiological performance metrics (SMR, MMR, and O<sub>2crit</sub>) were analysed using  
646 separate general linear mixed-effects models (GLMM) in package 'lme4' (Bates et  
647 al., 2015; Pinheiro et al., 2018). All models included respirometry group as a random  
648 intercept term to account for potential tank effects introduced during respirometry  
649 measurements. For each physiological metric the best supported model was  
650 determined as the model with the lowest corrected Akaike's information criterion,  
651 AICc (Burnham & Anderson, 1998; Hurvich & Tsai, 1989). Residual diagnostic plots

652 of each GLMM were then assessed using package ‘DHARMA’ to confirm validity of  
653 model fit (Hartig, 2020). Once the best supported model for each physiological  
654 parameter was identified (see Table S5 for model comparisons) predictions were  
655 made across a range of temperatures, O<sub>2</sub> levels, and CO<sub>2</sub> levels to visualise  
656 combined effects of these variables on the physiology of seabass. We then used  
657 function bootMer from lme4 (Pinheiro et al., 2018) to calculate 95 % confidence  
658 intervals of model predictions.

#### 659 5.5.2. Blood chemistry and Hb-O<sub>2</sub> affinity data analysis

660 Measurements of blood chemistry parameters (pH<sub>e</sub>, pH<sub>i</sub>, pCO<sub>2</sub>, HCO<sub>3</sub><sup>-</sup>, P<sub>50</sub>, Hills’  
661 number, Hct, Hb, lactate, and glucose) were analysed using the ambient water  
662 temperature of the treatment and using a categorical CO<sub>2</sub> level of low (i.e. ~400 µatm  
663 treatment) or high (i.e. ~1000 µatm treatment). Measurements were analysed using  
664 a type III sum of squares two-way ANOVA (to account for unequal sample sizes).  
665 Post hoc-tests were then conducted on least-square means generated by package  
666 ‘emmeans’ (Lenth, 2020), with Tukey adjusted p-values for multiple comparisons.  
667 Model residuals from analysis of plasma lactate and glucose measurements did not  
668 meet the assumptions of normality or equal variances required by two-way ANOVA,  
669 as such this data was analysed using the alternative non-parametric Kruskal-wallis  
670 test.

671 Blood-oxygen binding parameters (P<sub>50</sub> and Hills’ number) could not be obtained  
672 for fish in the 14 °C and high CO<sub>2</sub> treatment as a result of an equipment failure. As  
673 such these data were analysed using a one-way ANOVA. If statistical assumptions  
674 of one-way ANOVA were not met then data were analysed using the non-parametric  
675 Kruskal-Wallis test. Sample sizes for blood chemistry data can be seen in Table S4.



## 676 Acknowledgements

677 This work was supported by a NERC GW4+ Doctoral Training Partnership  
678 studentship from the Natural Environment Research Council [NE/L002434/1] with  
679 additional funding from CASE partner, The Centre of Fisheries and Aquaculture  
680 Science (Cefas) to D.W.M., and from the Biotechnology and Biological Sciences  
681 Research Council (BB/D005108/1 and BB/J00913X/1) and NERC (NE/H017402/1)  
682 to R.W.W. The authors would like to thank the Marine Management Organisation  
683 and Natural England for granting permits (Marine Management Organisation permit  
684 #030/17 & Natural England permit #OLD1002654) to collect wild sea bass for use in  
685 this study, and Simon Pengelly and the Southern Inshore Fisheries and  
686 Conservation Authority for assistance with fish collections. We would also like to  
687 thank the aquarium staff, particularly Steven Cooper, Alice Walpole and Rebecca  
688 Turner, of the Aquatic Resource Centre at the University of Exeter for assistance  
689 with fish husbandry and system water chemistry, and finally Dr Cosima Porteus for  
690 assistance with blood chemistry measurements.

## 691 Competing Interests

692 The authors declare no competing interests.

## 693 Data availability

694 Data will be made publicly available via the University of Exeter's online repository if  
695 the manuscript is accepted: <https://ore.exeter.ac.uk/repository/>

## 696 References

697 Anttila, K., Lewis, M., Prokkola, J. M., Kanerva, M., Seppänen, E., Kolari, I., &  
698 Nikinmaa, M. (2015). Warm acclimation and oxygen depletion induce species-

- 699 specific responses in salmonids. *The Journal of Experimental Biology*, 218(10),  
700 1471 LP – 1477. <https://doi.org/10.1242/jeb.119115>
- 701 Baker, D. W., May, C., & Brauner, C. J. (2009). A validation of intracellular pH  
702 measurements in fish exposed to hypercarbia: the effect of duration of tissue  
703 storage and efficacy of the metabolic inhibitor tissue homogenate method.  
704 *Journal of Fish Biology*, 75(1), 268–275. <https://doi.org/10.1111/j.1095->  
705 8649.2009.02261.x
- 706 Bates, D., Mächler, M., Bolker, B., & Walker, S. (2015). Fitting Linear Mixed-Effects  
707 Models Using lme4. *Journal of Statistical Software; Vol 1, Issue 1 (2015)*.
- 708 Bopp, L., Resplandy, L., Orr, J. C., Doney, S. C., Dunne, J. P., Gehlen, M., Halloran,  
709 P., Heinze, C., Ilyina, T., Séférian, R., Tjiputra, J., & Vichi, M. (2013). Multiple  
710 stressors of ocean ecosystems in the 21<sup>st</sup> century: projections with CMIP5  
711 models. *Biogeosciences*, 10(10), 6225–6245. <https://doi.org/10.5194/bg-10->  
712 6225-2013
- 713 Breitburg, D., Levin, L. A., Oschlies, A., Grégoire, M., Chavez, F. P., Conley, D. J.,  
714 Garçon, V., Gilbert, D., Gutiérrez, D., Isensee, K., Jacinto, G. S., Limburg, K. E.,  
715 Montes, I., Naqvi, S. W. A., Pitcher, G. C., Rabalais, N. N., Roman, M. R., Rose,  
716 K. A., Seibel, B. A., ... Zhang, J. (2018). Declining oxygen in the global ocean  
717 and coastal waters. *Science*, 359(6371).  
718 <https://doi.org/10.1126/science.aam7240>
- 719 Burnham, K. P., & Anderson, D. R. (1998). Practical use of the information-theoretic  
720 approach. In *Model selection and inference* (pp. 75–117). Springer.
- 721 Caldeira, K., & Wickett, M. E. (2003). Anthropogenic carbon and ocean pH. *Nature*,  
722 425, 365. <https://doi.org/10.1038/425365a>
- 723 Chabot, D., & Claireaux, G. (2008). Environmental hypoxia as a metabolic constraint  
724 on fish: The case of Atlantic cod, *Gadus morhua*. *Marine Pollution Bulletin*,  
725 57(6–12), 287–294.  
726 <https://doi.org/http://dx.doi.org/10.1016/j.marpolbul.2008.04.001>
- 727 Chabot, D., Steffensen, J. F., & Farrell, A. P. (2016). The determination of standard  
728 metabolic rate in fishes. *Journal of Fish Biology*, 88(1), 81–121.

- 729 Claireaux, G., & Chabot, D. (2016). Responses by fishes to environmental hypoxia:  
730 integration through Fry's concept of aerobic metabolic scope. *Journal of Fish*  
731 *Biology*, 88(1), 232–251. <https://doi.org/10.1111/jfb.12833>
- 732 Claireaux, G., & Lagardère, J. P. (1999). Influence of temperature, oxygen and  
733 salinity on the metabolism of the European sea bass. *Journal of Sea Research*,  
734 42(2), 157–168. [https://doi.org/http://dx.doi.org/10.1016/S1385-1101\(99\)00019-](https://doi.org/http://dx.doi.org/10.1016/S1385-1101(99)00019-2)  
735 2
- 736 Claireaux, G., Webber, D. M., Lagardère, J. P., & Kerr, S. R. (2000). Influence of  
737 water temperature and oxygenation on the aerobic metabolic scope of Atlantic  
738 cod (*Gadus morhua*). *Journal of Sea Research*, 44(3–4), 257–265.  
739 [https://doi.org/http://dx.doi.org/10.1016/S1385-1101\(00\)00053-8](https://doi.org/http://dx.doi.org/10.1016/S1385-1101(00)00053-8)
- 740 Clark, T. D., Sandblom, E., & Jutfelt, F. (2013). Aerobic scope measurements of  
741 fishes in an era of climate change: respirometry, relevance and  
742 recommendations. *The Journal of Experimental Biology*, 216(15), 2771.
- 743 Côté, I. M., Darling, E. S., & Brown, C. J. (2016). Interactions among ecosystem  
744 stressors and their importance in conservation. *Proceedings of the Royal*  
745 *Society B: Biological Sciences*, 283(1824).  
746 <https://doi.org/10.1098/rspb.2015.2592>
- 747 Crain, C. M., Kroeker, K., & Halpern, B. S. (2008). Interactive and cumulative effects  
748 of multiple human stressors in marine systems. *Ecology Letters*, 11(12), 1304–  
749 1315. <https://doi.org/10.1111/j.1461-0248.2008.01253.x>
- 750 Crespel, A., Anttila, K., Lelièvre, P., Quazuguel, P., Le Bayon, N., Zambonino-  
751 Infante, J.-L., Chabot, D., & Claireaux, G. (2019). Long-term effects of ocean  
752 acidification upon energetics and oxygen transport in the European sea bass  
753 (*Dicentrarchus labrax*, Linnaeus). *Marine Biology*, 166(9), 116.  
754 <https://doi.org/10.1007/s00227-019-3562-9>
- 755 Cucco, A., Sinerchia, M., Lefrançois, C., Magni, P., Ghezzi, M., Umgiesser, G.,  
756 Perilli, A., & Domenici, P. (2012). A metabolic scope based model of fish  
757 response to environmental changes. *Ecological Modelling*, 237–238, 132–141.  
758 <https://doi.org/https://doi.org/10.1016/j.ecolmodel.2012.04.019>

- 759 Del Raye, G., & Weng, K. C. (2015). An aerobic scope-based habitat suitability index  
760 for predicting the effects of multi-dimensional climate change stressors on  
761 marine teleosts. *Deep Sea Research Part II: Topical Studies in Oceanography*,  
762 113, 280–290. <https://doi.org/http://dx.doi.org/10.1016/j.dsr2.2015.01.014>
- 763 Deutsch, C., Ferrel, A., Seibel, B., Poertner, H.-O., & Huey, R. B. (2015). Climate  
764 change tightens a metabolic constraint on marine habitats. *Science*, 348(6239),  
765 1132–1135. <https://doi.org/10.1126/science.aaa1605>
- 766 Diaz, R. J., & Rosenberg, R. (2008). Spreading Dead Zones and Consequences for  
767 Marine Ecosystems. *Science*, 321(5891), 926.
- 768 Dickson, A G, & Millero, F. J. (1987). A comparison of the equilibrium constants for  
769 the dissociation of carbonic acid in seawater media. *Deep Sea Research Part A.*  
770 *Oceanographic Research Papers*, 34(10), 1733–1743.  
771 [https://doi.org/https://doi.org/10.1016/0198-0149\(87\)90021-5](https://doi.org/https://doi.org/10.1016/0198-0149(87)90021-5)
- 772 Dickson, Andrew G. (1990). Standard potential of the reaction:  $\text{AgCl(s)} + 12\text{H}_2(\text{g}) =$   
773  $\text{Ag(s)} + \text{HCl(aq)}$ , and the standard acidity constant of the ion  $\text{HSO}_4^-$  in  
774 synthetic sea water from 273.15 to 318.15 K. *The Journal of Chemical*  
775 *Thermodynamics*, 22(2), 113–127. [https://doi.org/https://doi.org/10.1016/0021-](https://doi.org/https://doi.org/10.1016/0021-9614(90)90074-Z)  
776 [9614\(90\)90074-Z](https://doi.org/https://doi.org/10.1016/0021-9614(90)90074-Z)
- 777 Duncan, M. I., James, N. C., Potts, W. M., & Bates, A. E. (2020). Different drivers,  
778 common mechanism; the distribution of a reef fish is restricted by local-scale  
779 oxygen and temperature constraints on aerobic metabolism. *Conservation*  
780 *Physiology*, 8(1). <https://doi.org/10.1093/conphys/coaa090>
- 781 Ern, R. (2019). A mechanistic oxygen- and temperature-limited metabolic niche  
782 framework. *Philosophical Transactions of the Royal Society B: Biological*  
783 *Sciences*, 374(1778), 20180540. <https://doi.org/10.1098/rstb.2018.0540>
- 784 Farrell, A P. (2016). Pragmatic perspective on aerobic scope: peaking, plummeting,  
785 pejus and apportioning. *Journal of Fish Biology*, 88(1), 322–343.  
786 <https://doi.org/10.1111/jfb.12789>
- 787 Farrell, Anthony P, & Richards, J. G. (2009). Chapter 11 Defining Hypoxia: An  
788 Integrative Synthesis of the Responses of Fish to Hypoxia. In A. P. F. and C. J.

- 789 B. Jeffrey G. Richards (Ed.), *Fish Physiology: Vol. Volume 27* (pp. 487–503).  
790 Academic Press. [https://doi.org/http://dx.doi.org/10.1016/S1546-5098\(08\)00011-](https://doi.org/http://dx.doi.org/10.1016/S1546-5098(08)00011-3)  
791 3
- 792 Fry, F. E. J. (1971). 1 - The Effect of Environmental Factors on the Physiology of  
793 Fish. In W. S. H. and D. J. Randall (Ed.), *Fish Physiology: Vol. Volume 6* (pp. 1–  
794 98). Academic Press. [https://doi.org/http://dx.doi.org/10.1016/S1546-](https://doi.org/http://dx.doi.org/10.1016/S1546-5098(08)60146-6)  
795 5098(08)60146-6
- 796 Gomez Isaza, D. F., Cramp, R. L., & Franklin, C. E. (2021). Thermal plasticity of the  
797 cardiorespiratory system provides cross-tolerance protection to fish exposed to  
798 elevated nitrate. *Comparative Biochemistry and Physiology Part C: Toxicology &*  
799 *Pharmacology*, 240, 108920.  
800 <https://doi.org/https://doi.org/10.1016/j.cbpc.2020.108920>
- 801 Grans, A., Jutfelt, F., Sandblom, E., Jonsson, E., Wiklander, K., Seth, H., Olsson, C.,  
802 Dupont, S., Ortega-Martinez, O., Einarsdottir, I., Bjornsson, B. T., Sundell, K., &  
803 Axelsson, M. (2014). Aerobic scope fails to explain the detrimental effects on  
804 growth resulting from warming and elevated CO<sub>2</sub> in Atlantic halibut. *J Exp Biol*,  
805 217(Pt 5), 711–717. <https://doi.org/10.1242/jeb.096743>
- 806 Hartig, F. (2020). *DHARMA: Residual Diagnostics for Hierarchical (Multi-*  
807 *Level/Mixed) Regression Models*. R Package version 0.3.0.
- 808 Heuer, R. M., & Grosell, M. (2016). Elevated CO<sub>2</sub> increases energetic cost and ion  
809 movement in the marine fish intestine. *Scientific Reports*, 6, 34480.  
810 <https://doi.org/10.1038/srep34480>  
811 <https://www.nature.com/articles/srep34480#supplementary-information>
- 812 Hollowed, A. B., Barange, M., Beamish, R. J., Brander, K., Cochrane, K., Drinkwater,  
813 K., Foreman, M. G. G., Hare, J. A., Holt, J., Ito, S., Kim, S., King, J. R., Loeng,  
814 H., MacKenzie, B. R., Mueter, F. J., Okey, T. A., Peck, M. A., Radchenko, V. I.,  
815 Rice, J. C., ... Yamanaka, Y. (2013). Projected impacts of climate change on  
816 marine fish and fisheries. *ICES Journal of Marine Science: Journal Du Conseil*,  
817 70(5), 1023–1037. <https://doi.org/10.1093/icesjms/fst081>
- 818 Howald, S., Cominassi, L., LeBayon, N., Claireaux, G., & Mark, F. C. (2019). Future  
819 ocean warming may prove beneficial for the northern population of European

- 820 seabass, but ocean acidification will not. *The Journal of Experimental Biology*,  
821 222(21), jeb213017. <https://doi.org/10.1242/jeb.213017>
- 822 Hurvich, C. M., & Tsai, C.-L. (1989). Regression and time series model selection in  
823 small samples. *Biometrika*, 76(2), 297–307.  
824 <https://doi.org/10.1093/biomet/76.2.297>
- 825 IPCC. (2014). *Climate Change 2014: Synthesis Report. Contribution of Working*  
826 *Groups I, II and III to the Fifth Assessment Report of the Intergovernmental*  
827 *Panel on Climate Change*.
- 828 Jerde, C. L., Kraskura, K., Eliason, E. J., Csik, S. R., Stier, A. C., & Taper, M. L.  
829 (2019). Strong Evidence for an Intraspecific Metabolic Scaling Coefficient Near  
830 0.89 in Fish . In *Frontiers in Physiology* (Vol. 10, p. 1166).
- 831 Jutfelt, F., Norin, T., Ern, R., Overgaard, J., Wang, T., McKenzie, D. J., Lefevre, S.,  
832 Nilsson, G. E., Metcalfe, N. B., Hickey, A. J. R., Brijs, J., Speers-Roesch, B.,  
833 Roche, D. G., Gamperl, A. K., Raby, G. D., Morgan, R., Esbaugh, A. J., Gräns,  
834 A., Axelsson, M., ... Clark, T. D. (2018). Oxygen- and capacity-limited thermal  
835 tolerance: blurring ecology and physiology. *The Journal of Experimental Biology*,  
836 221(1). <https://doi.org/10.1242/jeb.169615>
- 837 Krogh, A. (1916). *The respiratory exchange of animals and man* (Vol. 13).  
838 Longmans, Green.
- 839 Lagardère, J.-P., Begout-Anras, M. L., & Claireaux, G. (1998). Advances in  
840 invertebrate and fish telemetry. *Hydrobiologia*, 371, 372.
- 841 Lefevre, S. (2016). Are global warming and ocean acidification conspiring against  
842 marine ectotherms? A meta-analysis of the respiratory effects of elevated  
843 temperature, high CO<sub>2</sub> and their interaction. *Conservation Physiology*, 4(1).  
844 <https://doi.org/10.1093/conphys/cow009>
- 845 Lefevre, S. (2019). 6 - Effects of high CO<sub>2</sub> on oxygen consumption rates, aerobic  
846 scope and swimming performance. In M. Grosell, P. L. Munday, A. P. Farrell, &  
847 C. J. B. T.-F. P. Brauner (Eds.), *Carbon Dioxide* (Vol. 37, pp. 195–244).  
848 Academic Press. <https://doi.org/https://doi.org/10.1016/bs.fp.2019.08.001>



- 849 Lefrancois, C., & Claireaux, G. (2003). Influence of ambient oxygenation and  
850 temperature on metabolic scope and scope for heart rate in the common sole  
851 *Solea solea*. *Marine Ecology Progress Series*, 259, 273–284.
- 852 Lenth, R. (2020). *emmeans: Estimated Marginal Means, aka Least-Squares Means*.  
853 R Package Version 1.4.6.
- 854 Leo, E., Kunz, K. L., Schmidt, M., Storch, D., Portner, H. O., & Mark, F. C. (2017).  
855 Mitochondrial acclimation potential to ocean acidification and warming of Polar  
856 cod (*Boreogadus saida*) and Atlantic cod (*Gadus morhua*). *Frontiers in Zoology*,  
857 14, 12. <https://doi.org/10.1186/s12983-017-0205-1>
- 858 Lewis, C., Clemow, K., & Holt, W. V. (2013). Metal contamination increases the  
859 sensitivity of larvae but not gametes to ocean acidification in the polychaete  
860 *Pomatoceros lamarckii* (Quatrefages). *Marine Biology*, 160(8), 2089–2101.  
861 <https://doi.org/10.1007/s00227-012-2081-8>
- 862 Mallekh, R., & Lagardère, J. P. (2002). Effect of temperature and dissolved oxygen  
863 concentration on the metabolic rate of the turbot and the relationship between  
864 metabolic scope and feeding demand. *Journal of Fish Biology*, 60(5), 1105–  
865 1115. <https://doi.org/10.1111/j.1095-8649.2002.tb01707.x>
- 866 McBryan, T. L., Anttila, K., Healy, T. M., & Schulte, P. M. (2013). Responses to  
867 Temperature and Hypoxia as Interacting Stressors in Fish: Implications for  
868 Adaptation to Environmental Change. *Integrative and Comparative Biology*,  
869 53(4), 648–659. <https://doi.org/10.1093/icb/ict066>
- 870 McBryan, T. L., Healy, T. M., Haakons, K. L., & Schulte, P. M. (2016). Warm  
871 acclimation improves hypoxia tolerance in *Fundulus heteroclitus*.  
872 *The Journal of Experimental Biology*, 219(4), 474–484.  
873 <https://doi.org/10.1242/jeb.133413>
- 874 Melzner, F., Thomsen, J., Koeve, W., Oschlies, A., Gutowska, M. A., Bange, H. W.,  
875 Hansen, H. P., & Körtzinger, A. (2013). Future ocean acidification will be  
876 amplified by hypoxia in coastal habitats. *Marine Biology*, 160(8), 1875–1888.  
877 <https://doi.org/10.1007/s00227-012-1954-1>

- 878 Michaelidis, B., Spring, A., & Pörtner, H. O. (2007). Effects of long-term acclimation  
879 to environmental hypercapnia on extracellular acid–base status and metabolic  
880 capacity in Mediterranean fish *Sparus aurata*. *Marine Biology*, 150(6), 1417–  
881 1429.
- 882 Montgomery, D. W., Simpson, S. D., Engelhard, G. H., Birchenough, S. N. R., &  
883 Wilson, R. W. (2019). Rising CO<sub>2</sub> enhances hypoxia tolerance in a marine fish.  
884 *Scientific Reports*, 9(1), 15152. <https://doi.org/10.1038/s41598-019-51572-4>
- 885 Norin, T., & Clark, T. D. (2016). Measurement and relevance of maximum metabolic  
886 rate in fishes. *Journal of Fish Biology*, 88(1), 122–151.  
887 <https://doi.org/10.1111/jfb.12796>
- 888 Oellermann, M., Pörtner, H. O., & Mark, F. C. (2014). Simultaneous high-resolution  
889 pH and spectrophotometric recordings of oxygen binding in blood microvolumes.  
890 *The Journal of Experimental Biology*, 217(9), 1430 LP – 1436.  
891 <https://doi.org/10.1242/jeb.092726>
- 892 Pawson, M. G., Pickett, G. D., Leballeur, J., Brown, M., & Fritsch, M. (2007).  
893 Migrations, fishery interactions, and management units of sea bass  
894 (*Dicentrarchus labrax*) in Northwest Europe. *ICES Journal of Marine Science*,  
895 64(2), 332–345. <https://doi.org/10.1093/icesjms/fsl035>
- 896 Perry, S. F., & Abdallah, S. (2012). Mechanisms and consequences of carbon  
897 dioxide sensing in fish. *Respiratory Physiology & Neurobiology*, 184(3), 309–  
898 315. <https://doi.org/https://doi.org/10.1016/j.resp.2012.06.013>
- 899 Person-Le Ruyet, J., Mahé, K., Le Bayon, N., & Le Delliou, H. (2004). Effects of  
900 temperature on growth and metabolism in a Mediterranean population of  
901 European sea bass, *Dicentrarchus labrax*. *Aquaculture*, 237(1), 269–280.  
902 <https://doi.org/https://doi.org/10.1016/j.aquaculture.2004.04.021>
- 903 Pierrot, D., Lewis, E., & Wallace, D. W. R. (2006). CO<sub>2</sub>SYSDOS Program  
904 developed for CO<sub>2</sub> system calculations. In *ORNL/CDIAC-105*. Carbon Dioxide  
905 Information Analysis Center, Oak Ridge National Laboratory, US Department of  
906 Energy, Oak Ridge, TN.



- 907 Pilakouta, N., Killen, S. S., Kristjánsson, B. K., Skúlason, S., Lindström, J., Metcalfe,  
908 N. B., & Parsons, K. J. (2020). Multigenerational exposure to elevated  
909 temperatures leads to a reduction in standard metabolic rate in the wild.  
910 *Functional Ecology*, 34(6), 1205–1214. <https://doi.org/10.1111/1365-2435.13538>
- 911 Pinheiro, J., Bates, D., DebRoy, S., Sarkar, D., & Team, R. C. (2018). *nlme: Linear*  
912 *and Nonlinear Mixed Effects Models* (3.1-137).
- 913 Pörtner, H. O. (2012). Integrating climate-related stressor effects on marine  
914 organisms: unifying principles linking molecule to ecosystem-level changes.  
915 *Marine Ecology Progress Series*, 470, 273–290.
- 916 Pörtner, H. O., Bock, C., & Mark, F. C. (2017). Oxygen- and capacity-limited thermal  
917 tolerance: bridging ecology and physiology. *The Journal of Experimental*  
918 *Biology*, 220(15), 2685–2696. <https://doi.org/10.1242/jeb.134585>
- 919 Pörtner, H. O., & Farrell, A. P. (2008). Physiology and Climate Change. *Science*,  
920 322(5902), 690.
- 921 Pörtner, H. O., & Peck, M. A. (2010). Climate change effects on fishes and fisheries:  
922 towards a cause-and-effect understanding. *Journal of Fish Biology*, 77(8), 1745–  
923 1779. <https://doi.org/10.1111/j.1095-8649.2010.02783.x>
- 924 R Core Team. (2020). *R: A language and environment for statistical computing*. R  
925 Foundation for Statistical Computing.
- 926 Rummer, J. L., Stecyk, J. A. W., Couturier, C. S., Watson, S.-A., Nilsson, G. E., &  
927 Munday, P. L. (2013). Elevated CO<sub>2</sub> enhances aerobic scope of a coral reef fish.  
928 *Conservation Physiology*, 1(1). <https://doi.org/10.1093/conphys/cot023>
- 929 Sandblom, E., & Axelsson, M. (2005). Effects of hypoxia on the venous circulation in  
930 rainbow trout (*Oncorhynchus mykiss*). *Comparative Biochemistry and*  
931 *Physiology Part A: Molecular & Integrative Physiology*, 140(2), 233–239.  
932 <https://doi.org/https://doi.org/10.1016/j.cbpb.2005.01.005>
- 933 Sandblom, Erik, Clark, T. D., Gräns, A., Ekström, A., Brijs, J., Sundström, L. F.,  
934 Odelström, A., Adill, A., Aho, T., & Jutfelt, F. (2016). Physiological constraints to  
935 climate warming in fish follow principles of plastic floors and concrete ceilings.  
936 *Nature Communications*, 7(1), 11447. <https://doi.org/10.1038/ncomms11447>

- 937 Sandblom, Erik, Gräns, A., Axelsson, M., & Seth, H. (2014). Temperature  
938 acclimation rate of aerobic scope and feeding metabolism in fishes: implications  
939 in a thermally extreme future. *Proceedings of the Royal Society B: Biological*  
940 *Sciences*, 281(1794), 20141490. <https://doi.org/10.1098/rspb.2014.1490>
- 941 Schulte, P. M., Healy, T. M., & Fanguie, N. A. (2011). Thermal Performance Curves,  
942 Phenotypic Plasticity, and the Time Scales of Temperature Exposure.  
943 *Integrative and Comparative Biology*, 51(5), 691–702.  
944 <https://doi.org/10.1093/icb/icr097>
- 945 Seibel, B. A., & Deutsch, C. (2020). Oxygen supply capacity in animals evolves to  
946 meet maximum demand at the current oxygen partial pressure regardless of  
947 size or temperature. *The Journal of Experimental Biology*, jeb.210492.  
948 <https://doi.org/10.1242/jeb.210492>
- 949 Slesinger, E., Andres, A., Young, R., Seibel, B., Saba, V., Phelan, B., Rosendale, J.,  
950 Wieczorek, D., & Saba, G. (2019). The effect of ocean warming on black sea  
951 bass (*Centropristis striata*) aerobic scope and hypoxia tolerance. *PLOS ONE*,  
952 14(6), e0218390.
- 953 Souche, E. L., Hellemans, B., Babbucci, M., MacAoidh, E., Guinand, B., Bargelloni,  
954 L., Chistiakov, D. A., Patarnello, T., Bonhomme, F., Martinsohn, J. T., &  
955 Volckaert, F. A. M. (2015). Range-wide population structure of European sea  
956 bass *Dicentrarchus labrax*. *Biological Journal of the Linnean Society*, 116(1),  
957 86–105. <https://doi.org/10.1111/bij.12572>
- 958 Strobel, A., Bennecke, S., Leo, E., Mintenbeck, K., Pörtner, H. O., & Mark, F. C.  
959 (2012). Metabolic shifts in the Antarctic fish *Notothenia rossii* in response to  
960 rising temperature and P CO<sub>2</sub>. *Frontiers in Zoology*, 9.  
961 <https://doi.org/http://dx.doi.org/10.1186/1742-9994-9-28>
- 962 Strobel, A., Leo, E., Pörtner, H. O., & Mark, F. C. (2013). Elevated temperature and  
963 PCO<sub>2</sub> shift metabolic pathways in differentially oxidative tissues of *Notothenia*  
964 *rossii*. *Comparative Biochemistry and Physiology Part B: Biochemistry and*  
965 *Molecular Biology*, 166(1), 48–57.  
966 <https://doi.org/http://dx.doi.org/10.1016/j.cbpb.2013.06.006>

- 967 Svendsen, M. B. S., Bushnell, P. G., & Steffensen, J. F. (2016a). Design and setup  
968 of intermittent-flow respirometry system for aquatic organisms. *Journal of Fish*  
969 *Biology*, *88*(1), 26–50. <https://doi.org/10.1111/jfb.12797>
- 970 Svendsen, M. B. S., Bushnell, P. G., & Steffensen, J. F. (2016b). Design and setup  
971 of intermittent-flow respirometry system for aquatic organisms. *Journal of Fish*  
972 *Biology*, *88*(1), 26–50. <https://doi.org/10.1111/jfb.12797>
- 973 Tinker, J. P., Howes, E. L., Wakelin, S., Menary, M., Kent, E., Berry, D., Hindson, J.,  
974 Ribeiro, J., Dye, S., Andres, O., Lyons, K., & Smyth, T. (2020). The impacts of  
975 climate change on temperature (air and sea) relevant to the coastal and marine  
976 environment around the UK. *MCCIP Science Review 2020*, 1–30.  
977 <https://doi.org/10.14465/2020.arc01.tem>
- 978 Todgham, A. E., & Stillman, J. H. (2013). Physiological Responses to Shifts in  
979 Multiple Environmental Stressors: Relevance in a Changing World. *Integrative*  
980 *and Comparative Biology*, *53*(4), 539–544.
- 981 Wernberg, T., Smale, D. A., & Thomsen, M. S. (2012). A decade of climate change  
982 experiments on marine organisms: procedures, patterns and problems. *Global*  
983 *Change Biology*, *18*(5), 1491–1498. [https://doi.org/10.1111/j.1365-](https://doi.org/10.1111/j.1365-2486.2012.02656.x)  
984 [2486.2012.02656.x](https://doi.org/10.1111/j.1365-2486.2012.02656.x)
- 985 Wood, C. M., Turner, J. D., & Graham, M. S. (1983). Why do fish die after severe  
986 exercise? *Journal of Fish Biology*, *22*(2), 189–201.  
987 <https://doi.org/10.1111/j.1095-8649.1983.tb04739.x>
- 988 Zeidler, R., & Kim, H. D. (1977). Preferential hemolysis of postnatal calf red cells  
989 induced by internal alkalinization. *The Journal of General Physiology*, *70*(3),  
990 385–401. <https://doi.org/10.1085/jgp.70.3.385>
- 991
- 992
- 993
- 994

995 **Supplementary materials**

996 **Table S1:** Measurements of  $p\text{CO}_2$  ( $\mu\text{atm}$ , top row) and pH (NBS scale, bottom row)  
 997 as  $\text{O}_2$  declined during  $\text{O}_{2\text{crit}}$  trials for each treatment. All values are mean  $\pm$  S.D. apart  
 998 from for Treatment 3 at  $\sim 30\%$  dissolved  $\text{O}_2$  where only one measurement of  $p\text{CO}_2$   
 999 and pH was made and calculations of mean and S.D. were not possible

| ~Dissolved $\text{O}_2$<br>(% air saturation) | Treatment             |                       |                       |                      |                      |                      |
|-----------------------------------------------|-----------------------|-----------------------|-----------------------|----------------------|----------------------|----------------------|
|                                               | 14 °C                 |                       | 18 °C                 |                      | 22 °C                |                      |
|                                               | Present $\text{CO}_2$ | Present $\text{CO}_2$ | Present $\text{CO}_2$ | Future $\text{CO}_2$ | Future $\text{CO}_2$ | Future $\text{CO}_2$ |
| 100                                           | 377 $\pm$ 23          | 483 $\pm$ 20          | 455 $\pm$ 35          | 1019 $\pm$ 50        | 1070 $\pm$ 10        | 1172 $\pm$ 89        |
|                                               | 8.14 $\pm$ 0.02       | 8.09 $\pm$ 0.02       | 8.10 $\pm$ 0.04       | 7.79 $\pm$ 0.01      | 7.78 $\pm$ 0.00      | 7.80 $\pm$ 0.03      |
| 80                                            | 418 $\pm$ 9           | 508 $\pm$ 10          | 486 $\pm$ 47          | 1149 $\pm$ 2         | 1156 $\pm$ 86        | 1209 $\pm$ 18        |
|                                               | 8.10 $\pm$ 0.01       | 8.07 $\pm$ 0.01       | 8.07 $\pm$ 0.04       | 7.74 $\pm$ 0.01      | 7.75 $\pm$ 0.02      | 7.79 $\pm$ 0.02      |
| 60                                            | 477 $\pm$ 25          | 613 $\pm$ 90          | 497 $\pm$ 23          | 1383 $\pm$ 125       | 1315 $\pm$ 73        | 1335 $\pm$ 92        |
|                                               | 8.05 $\pm$ 0.02       | 7.99 $\pm$ 0.01       | 8.07 $\pm$ 0.02       | 7.67 $\pm$ 0.02      | 7.69 $\pm$ 0.02      | 7.75 $\pm$ 0.03      |
| 40                                            | 625 $\pm$ 44          | 746 $\pm$ 40          | 577 $\pm$ 46          | 1637 $\pm$ 83        | 1488 $\pm$ 24        | 1658 $\pm$ 237       |
|                                               | 7.94 $\pm$ 0.03       | 7.92 $\pm$ 0.02       | 8.01 $\pm$ 0.04       | 7.59 $\pm$ 0.01      | 7.64 $\pm$ 0.00      | 7.66 $\pm$ 0.05      |
| 30                                            | 822                   | 1104 $\pm$ 155        | 647 $\pm$ 18          | 1973 $\pm$ 159       | 1964 $\pm$ 134       | 2179 $\pm$ 63        |
|                                               | 7.83                  | 7.76 $\pm$ 0.06       | 7.96 $\pm$ 0.01       | 7.51 $\pm$ 0.04      | 7.53 $\pm$ 0.02      | 7.55 $\pm$ 0.01      |
| 20                                            | 1162 $\pm$ 2          | 2103 $\pm$ 79         | 808 $\pm$ 35          | 2491 $\pm$ 238       | 2416 $\pm$ 265       | 2547 $\pm$ 266       |
|                                               | 7.69 $\pm$ 0.00       | 7.50 $\pm$ 0.02       | 7.88 $\pm$ 0.02       | 7.42 $\pm$ 0.05      | 7.45 $\pm$ 0.03      | 7.48 $\pm$ 0.06      |
| 15                                            | 1734 $\pm$ 92         | 2431 $\pm$ 663        | 1318 $\pm$ 108        | 3099 $\pm$ 448       | 2579 $\pm$ 4         | 3380 $\pm$ 354       |
|                                               | 7.53 $\pm$ 0.02       | 7.45 $\pm$ 0.11       | 7.68 $\pm$ 0.04       | 7.32 $\pm$ 0.07      | 7.41 $\pm$ 0.00      | 7.36 $\pm$ 0.06      |

1000 **Table S2:** Temperature (°C), pCO<sub>2</sub> (µatm), and O<sub>2</sub> (kPa) conditions sea bass were exposed to pre-chase, during chase, and when recovering from exercise during measurements of MMR. All  
 1001 values are presented as mean ± S.E. - indicates measurements for which data was not collected. For the 14 °C present day CO<sub>2</sub> treatment missing pre-chase values would be expected to be  
 1002 extremely similar to values recorded during chase as shown by values for all other treatments.

|                       |                         | Treatment                     |                 |            |                               |                 |            |                               |                 |            |                              |                 |            |                              |                 |            |                              |                 |            |
|-----------------------|-------------------------|-------------------------------|-----------------|------------|-------------------------------|-----------------|------------|-------------------------------|-----------------|------------|------------------------------|-----------------|------------|------------------------------|-----------------|------------|------------------------------|-----------------|------------|
|                       |                         | 14 °C Present CO <sub>2</sub> |                 |            | 18 °C Present CO <sub>2</sub> |                 |            | 22 °C Present CO <sub>2</sub> |                 |            | 14 °C Future CO <sub>2</sub> |                 |            | 18 °C Future CO <sub>2</sub> |                 |            | 22 °C Future CO <sub>2</sub> |                 |            |
|                       |                         | Pre-<br>chase                 | During<br>chase | Recovery   | Pre-<br>chase                 | During<br>chase | Recovery   | Pre-<br>chase                 | During<br>chase | Recovery   | Pre-<br>chase                | During<br>chase | Recovery   | Pre-<br>chase                | During<br>chase | Recovery   | Pre-<br>chase                | During<br>chase | Recovery   |
| ~100 % air saturation | Temp (°C)               | 13.9 ± 0.1                    | 13.9 ± 0.1      | 13.9 ± 0.1 | -                             | 18.3 ± 0.5      | 18.3 ± 0.5 | 22.0 ± 0.0                    | 21.8 ± 0.1      | 22.0 ± 0.0 | 13.9 ± 0.0                   | 14.2 ± 0.5      | 13.9 ± 0.1 | 18.0 ± 0.1                   | 18.5 ± 0.0      | 18.0 ± 0.2 | 21.6 ± 0.1                   | 22.3 ± 1.1      | 21.9 ± 0.1 |
|                       | pCO <sub>2</sub> (µatm) | -                             | -               | 364 ± 12   | -                             | 522 ± 105       | 522 ± 105  | -                             | -               | 404 ± 0    | 1056 ± 27                    | 1148 ± 171      | 1040 ± 4   | 1085 ± 57                    | 1129 ± 44       | 1195 ± 44  | 1092 ± 27                    | 1168 ± 177      | 1100 ± 52  |
|                       | O <sub>2</sub> (kPa)    | -                             | -               | 19.6 ± 0.1 | 20.8                          | 20.7            | 19.3 ± 0.2 | -                             | -               | 18.8 ± 0.2 | 20.0 ± 0.3                   | 20.7 ± 0.2      | 19.2 ± 0.6 | 20.8 ± 0.4                   | 20.4 ± 0.6      | 19.1 ± 0.3 | 20.5 ± 0.2                   | 20.3 ± 0.1      | 19.2 ± 0.9 |
| ~60 % air saturation  | Temp (°C)               | 13.3 ± 0.1                    | 13.6 ± 0.1      | 13.9 ± 0.1 | -                             | 17.7 ± 0.1      | 18.7 ± 0.1 | 20.5 ± 0.1                    | 21.4 ± 0.2      | 22.0 ± 0.0 | 13.7 ± 0.2                   | 13.8 ± 0.4      | 14.0 ± 0.2 | 17.5 ± 0.2                   | 17.7 ± 0.2      | 18.0 ± 0.1 | 21.2 ± 0.4                   | 21.2 ± 0.3      | 21.9 ± 0.1 |
|                       | pCO <sub>2</sub> (µatm) | 542 ± 67                      | -               | 501 ± 69   | -                             | 619 ± 98        | 674 ± 37   | 554 ± 25                      | -               | 579 ± 93   | 1533 ± 62                    | 1577 ± 67       | 1528 ± 44  | 1457 ± 137                   | 1486 ± 168      | 1540 ± 38  | 1468 ± 67                    | 1436 ± 58       | 1468 ± 60  |
|                       | O <sub>2</sub> (kPa)    | 13.9 ± 0.3                    | 14.5 ± 0.2      | 12.0 ± 0.1 | 14.3 ± 0.3                    | 14.3 ± 0.6      | 11.8 ± 1.0 | 14.3 ± 0.2                    | 14.8 ± 0.0      | 11.6 ± 0.2 | 14.5 ± 0.2                   | 14.4 ± 0.0      | 12.0 ± 0.1 | 14.4 ± 0.3                   | 14.4 ± 0.2      | 11.9 ± 0.2 | 14.5 ± 0.2                   | 14.5 ± 0.1      | 11.5 ± 0.1 |
| ~30 % air saturation  | Temp (°C)               | 13.1 ± 0.2                    | 13.4 ± 0.0      | 13.8 ± 0.1 | -                             | 17.6 ± 0.5      | 18.7 ± 0.1 | 20.5 ± 0.1                    | 21.4 ± 0.1      | 22.0 ± 0.0 | 12.9 ± 0.2                   | 13.1 ± 0.6      | 13.9 ± 0.1 | 17.6 ± 0.0                   | 17.6 ± 0.1      | 18.3 ± 0.2 | 20.9 ± 0.1                   | 20.9 ± 0.1      | 21.9 ± 0.1 |
|                       | pCO <sub>2</sub> (µatm) | 1173 ± 95                     | -               | 839 ± 53   | -                             | 854 ± 40        | 793 ± 118  | 929 ± 85                      | -               | 898 ± 101  | 2575 ± 243                   | 2467 ± 110      | 2219 ± 216 | 2213 ± 135                   | 2278 ± 179      | 2123 ± 272 | 2400 ± 126                   | 2399 ± 34       | 2027 ± 100 |
|                       | O <sub>2</sub> (kPa)    | 8.3 ± 0.3                     | 8.8 ± 0.0       | 6.1 ± 0.1  | 8.4 ± 0.5                     | 8.6 ± 0.3       | 6.8 ± 0.8  | 8.5 ± 0.3                     | 8.8 ± 0.2       | 6.6 ± 0.2  | 9.1 ± 0.3                    | 8.9 ± 0.0       | 6.7 ± 0.1  | 8.8 ± 0.4                    | 9.1 ± 0.1       | 6.4 ± 0.3  | 8.7 ± 0.5                    | 8.7 ± 0.3       | 6.4 ± 0.5  |

1003 **Table S3:** Temperature and  $p\text{CO}_2$  levels fish were exposed to when they were  
 1004 anaesthetised immediately prior to blood sampling. All measures are given as  
 1005 mean  $\pm$  S.D.

| Parameter                          | Treatment               |                         |                         |                        |                        |                        |
|------------------------------------|-------------------------|-------------------------|-------------------------|------------------------|------------------------|------------------------|
|                                    | 14 °C                   | 18 °C                   | 22 °C                   | 14 °C                  | 18 °C                  | 22 °C                  |
|                                    | Present CO <sub>2</sub> | Present CO <sub>2</sub> | Present CO <sub>2</sub> | Future CO <sub>2</sub> | Future CO <sub>2</sub> | Future CO <sub>2</sub> |
| Temperature (°C)                   | 13.1 $\pm$ 0.1          | 17.4 $\pm$ 0.1          | 21.2 $\pm$ 0.3          | 13.3 $\pm$ 0.3         | 17.8 $\pm$ 0.1         | 21.3 $\pm$ 0.2         |
| $p\text{CO}_2$ ( $\mu\text{atm}$ ) | 350 $\pm$ 13            | 445 $\pm$ 52            | 398 $\pm$ 28            | 1130 $\pm$ 33          | 1103 $\pm$ 47          | 1221 $\pm$ 35          |

1006

1007 **Table S4:** Samples sizes for each measurement in all treatments. We were  
 1008 unable to make measurements of P<sub>50</sub> or Hills number for the 14 °C future CO<sub>2</sub>  
 1009 scenario due to an equipment failure.

| Measurement                          | Treatment               |                         |                         |                        |                        |                        |
|--------------------------------------|-------------------------|-------------------------|-------------------------|------------------------|------------------------|------------------------|
|                                      | 14 °C                   | 18 °C                   | 22 °C                   | 14 °C                  | 18 °C                  | 22 °C                  |
|                                      | Present CO <sub>2</sub> | Present CO <sub>2</sub> | Present CO <sub>2</sub> | Future CO <sub>2</sub> | Future CO <sub>2</sub> | Future CO <sub>2</sub> |
| SMR                                  | 10                      | 10                      | 10                      | 10                     | 10                     | 10                     |
| O <sub>2crit</sub>                   | 10                      | 10                      | 10                      | 10                     | 10                     | 10                     |
| MMR at ~21 kPa O <sub>2</sub>        | 9                       | 10                      | 10                      | 12                     | 10                     | 10                     |
| MMR at ~12 kPa O <sub>2</sub>        | 10                      | 7                       | 10                      | 10                     | 10                     | 10                     |
| MMR at ~6 kPa O <sub>2</sub>         | 10                      | 7                       | 10                      | 10                     | 10                     | 10                     |
| Blood pH <sub>e</sub>                | 10                      | 6                       | 9                       | 10                     | 9                      | 7                      |
| Plasma $p\text{CO}_2$                | 10                      | 6                       | 9                       | 10                     | 9                      | 7                      |
| Plasma HCO <sub>3</sub> <sup>-</sup> | 10                      | 6                       | 9                       | 10                     | 9                      | 7                      |
| RBC pH <sub>i</sub>                  | 10                      | 6                       | 8                       | 9                      | 9                      | 7                      |
| P <sub>50</sub>                      | 10                      | 6                       | 9                       | NA                     | 8                      | 7                      |
| Hills number                         | 10                      | 6                       | 9                       | NA                     | 8                      | 7                      |
| Haematocrit                          | 10                      | 6                       | 9                       | 10                     | 9                      | 7                      |
| Haemoglobin                          | 7                       | 6                       | 9                       | 10                     | 9                      | 7                      |
| Plasma lactate                       | 9                       | 6                       | 9                       | 7                      | 8                      | 7                      |
| Plasma glucose                       | 9                       | 6                       | 10                      | 7                      | 8                      | 7                      |

1010

1011

1012

1013 **Table S5:** Structure of models and model comparison results explaining  
 1014 variation in SMR,  $O_{2crit}$ , and MMR of sea bass exposed to differing combinations  
 1015 of temperature,  $O_2$ , and  $CO_2$ . The best supported model for each response  
 1016 variable is highlighted in bold.

| Response Variable                                             | Explanatory Variables Structure              | AICc                                                                                                 | $\Delta$ AICc | d.f.     |           |
|---------------------------------------------------------------|----------------------------------------------|------------------------------------------------------------------------------------------------------|---------------|----------|-----------|
| SMR                                                           | <b>Temperature + <math>CO_2</math></b>       | <b>546.3</b>                                                                                         | <b>0</b>      | <b>5</b> |           |
|                                                               | Temperature                                  | 548.2                                                                                                | 1.9           | 4        |           |
|                                                               | Temperature* $CO_2$                          | 548.7                                                                                                | 2.4           | 6        |           |
|                                                               | $CO_2$                                       | 578.4                                                                                                | 32.1          | 4        |           |
| $O_{2crit}$                                                   | <b>Temperature + <math>CO_2</math> + SMR</b> | <b>72.7</b>                                                                                          | <b>0</b>      | <b>6</b> |           |
|                                                               | Temperature * SMR + $CO_2$                   | 75.2                                                                                                 | 2.5           | 7        |           |
|                                                               | Temperature * $CO_2$ + SMR                   | 75.2                                                                                                 | 2.5           | 7        |           |
|                                                               | Temperature + $CO_2$ * SMR                   | 75.3                                                                                                 | 2.6           | 7        |           |
|                                                               | Temperature + SMR                            | 76.2                                                                                                 | 3.5           | 5        |           |
|                                                               | Temperature*SMR                              | 78.6                                                                                                 | 5.9           | 6        |           |
|                                                               | Temperature * $CO_2$ * SMR                   | 83.0                                                                                                 | 10.3          | 10       |           |
|                                                               | SMR                                          | 84.0                                                                                                 | 11.3          | 4        |           |
|                                                               | SMR + $CO_2$                                 | 84.8                                                                                                 | 12.1          | 5        |           |
|                                                               | SMR* $CO_2$                                  | 87.2                                                                                                 | 14.5          | 6        |           |
|                                                               | Temperature                                  | 134.2                                                                                                | 61.5          | 4        |           |
|                                                               | Temperature + $CO_2$                         | 136.4                                                                                                | 63.7          | 5        |           |
|                                                               | Temperature* $CO_2$                          | 138.8                                                                                                | 66.1          | 6        |           |
|                                                               | $CO_2$                                       | 144.0                                                                                                | 71.3          | 4        |           |
|                                                               | MMR                                          | <b><math>CO_2</math> + Temperature*<math>O_2</math> + Temperature*(<math>O_2</math>)<sup>2</sup></b> | <b>2240.8</b> | <b>0</b> | <b>12</b> |
|                                                               |                                              | $CO_2$ *Temperature* $O_2$ + Temperature*( $O_2$ ) <sup>2</sup>                                      | 2243.0        | 2.2      | 15        |
| $CO_2$ + Temperature* $O_2$ + ( $O_2$ ) <sup>2</sup>          |                                              | 2247.5                                                                                               | 6.7           | 11       |           |
| $CO_2$ *Temperature* $O_2$ + ( $O_2$ ) <sup>2</sup>           |                                              | 2248.8                                                                                               | 8.0           | 14       |           |
| Temperature + $CO_2$ * $O_2$ + $CO_2$ *( $O_2$ ) <sup>2</sup> |                                              | 2280.1                                                                                               | 39.3          | 12       |           |
| $CO_2$ *Temperature* $O_2$                                    |                                              | 2349.8                                                                                               | 109.0         | 13       |           |
| Temperature + $CO_2$ * $O_2$                                  |                                              | 2360.7                                                                                               | 119.9         | 10       |           |
| $CO_2$ + Temperature* $O_2$                                   |                                              | 2362.8                                                                                               | 122.0         | 10       |           |
| $CO_2$ * $O_2$                                                |                                              | 2365.1                                                                                               | 124.3         | 9        |           |
| Temperature* $CO_2$ + $O_2$                                   |                                              | 2371.4                                                                                               | 130.6         | 10       |           |
| Temperature + $CO_2$ + $O_2$                                  |                                              | 2379.7                                                                                               | 138.9         | 9        |           |
| Temperature + $CO_2$                                          |                                              | 2464.3                                                                                               | 223.5         | 8        |           |
| Temperature + $O_2$                                           |                                              | 2464.7                                                                                               | 223.9         | 8        |           |
| Temperature * $CO_2$                                          |                                              | 2465.4                                                                                               | 224.6         | 9        |           |
| Temperature* $O_2$                                            |                                              | 2467.0                                                                                               | 226.2         | 9        |           |

|                 |        |       |   |
|-----------------|--------|-------|---|
| CO <sub>2</sub> | 2478.3 | 237.5 | 7 |
| O <sub>2</sub>  | 2488.8 | 248.0 | 7 |
| Temperature     | 2638.1 | 397.3 | 7 |

1017

1018 **Table S6:** General linear mixed-effects model outputs for analysis of standard  
 1019 metabolic rate. The best supported model was fitted using a Gaussian  
 1020 distribution and included the parameters temperature and CO<sub>2</sub> as explanatory  
 1021 variables and group ID as a random intercept term. Parameter effects are  
 1022 compared against a reference level where temperature and CO<sub>2</sub> are 0. Marginal  
 1023  $R^2 = 0.70$ , Condition  $R^2 = 0.70$ . Confidence intervals for each parameter were  
 1024 determined from function confint in package lme4. Marginal and conditional  $R^2$   
 1025 of the model were determined using function r.squaredGLMM from package  
 1026 MuMIn.

| Parameter                                                                    | Estimate | Standard Error | Confidence Interval (95%) | t-value | Variance | Standard Deviation |
|------------------------------------------------------------------------------|----------|----------------|---------------------------|---------|----------|--------------------|
| Best supported model <- lmer(SMR ~Temperature + CO <sub>2</sub> + (1 Group)) |          |                |                           |         |          |                    |
| Intercept                                                                    | -14.77   | 11.62          | -37.35 – 7.81             | -1.27   |          |                    |
| Temperature                                                                  | 6.66     | 0.57           | 5.55 – 7.78               | 11.61   |          |                    |
| CO <sub>2</sub>                                                              | -0.012   | 0.006          | -0.024 – -0.001           | -2.04   |          |                    |
| Group                                                                        |          |                |                           |         | 0.0      | 0.0                |

1027

1028 **Table S7:** General linear mixed-effects model outputs for analysis of O<sub>2crit</sub>. The  
 1029 best supported model was fitted using a Gaussian distribution and included the  
 1030 parameters temperature, CO<sub>2</sub>, and SMR as explanatory variables and group ID  
 1031 as a random intercept term. Parameter effects are compared against a  
 1032 reference level where temperature, CO<sub>2</sub>, and SMR are 0. Marginal  $R^2 = 0.72$ ,  
 1033 Condition  $R^2 = 0.77$ . Confidence intervals for each parameter were determined  
 1034 from function confint in package lme4. Marginal and conditional  $R^2$  of the model  
 1035 were determined using function r.squaredGLMM from package MuMIn.

| Parameter                                                                          | Estimate | Standard Error | Confidence Interval (95%) | t-value | Variance | Standard Deviation |
|------------------------------------------------------------------------------------|----------|----------------|---------------------------|---------|----------|--------------------|
| Best supported model <- lmer(O2crit~ Temperature+CO <sub>2</sub> +SMR) + (1 Group) |          |                |                           |         |          |                    |
| Intercept                                                                          | 2.174    | 0.421          | 1.401 – 2.945             | 5.16    |          |                    |
| Temperature                                                                        | -0.126   | 0.031          | -0.185 – -0.068           | -4.00   |          |                    |



|                 |        |        |                 |       |      |      |
|-----------------|--------|--------|-----------------|-------|------|------|
| CO <sub>2</sub> | 0.0005 | 0.0002 | 0.0001 – 0.0009 | 10.75 |      |      |
| SMR             | 0.036  | 0.003  | 0.030 – 0.043   | 2.37  |      |      |
| Group           |        |        |                 |       | 0.03 | 0.18 |

1036

1037 **Table S8:** General linear mixed model outputs for analysis of maximum  
 1038 metabolic rate. The best supported model was fitted using a Gaussian  
 1039 distribution and included the parameters temperature and CO<sub>2</sub> as explanatory  
 1040 variables and group ID as a random intercept term. Parameter effects are  
 1041 compared against a reference level where temperature and CO<sub>2</sub> are 0. Marginal  
 1042  $R^2 = 0.91$ , Condition  $R^2 = 0.96$ . Confidence intervals for each parameter were  
 1043 determined from function confint in package lme4. Marginal and conditional  $R^2$   
 1044 of the model were determined using function r.squaredGLMM from package  
 1045 MuMIn.

1046

| Parameter                                                                                                                                                                                                | Estimate | Standard Error | Confidence Interval (95%) | t-value | Variance                | Standard Deviation |
|----------------------------------------------------------------------------------------------------------------------------------------------------------------------------------------------------------|----------|----------------|---------------------------|---------|-------------------------|--------------------|
| Best supported model < - lmer(MMR ~ scale(Temperature)*scale(O <sub>2</sub> ) + scale(Temperature)*scale(O <sub>2</sub> <sup>2</sup> ) + scale(CO <sub>2</sub> ) + (O <sub>2</sub>  Fish ID) + (1 Group) |          |                |                           |         |                         |                    |
| Intercept                                                                                                                                                                                                | 231.99   | 2.58           | 227.01 – 236.98           | 89.96   |                         |                    |
| scale(Temperature)                                                                                                                                                                                       | 32.53    | 2.55           | 27.60 – 37.46             | 12.76   |                         |                    |
| scale(O <sub>2</sub> )                                                                                                                                                                                   | 240.35   | 9.50           | 221.92 – 258.74           | 25.31   |                         |                    |
| scale(Temperature*O <sub>2</sub> )                                                                                                                                                                       | 41.95    | 8.60           | 25.26 – 58.62             | 4.88    |                         |                    |
| scale(O <sub>2</sub> <sup>2</sup> )                                                                                                                                                                      | -157.69  | 8.68           | -174.50 – -140.85         | -18.17  |                         |                    |
| scale(Temperature*O <sub>2</sub> <sup>2</sup> )                                                                                                                                                          | -25.10   | 8.36           | -41.31 – -8.86            | -3.00   |                         |                    |
| scale(CO <sub>2</sub> )                                                                                                                                                                                  | -7.52    | 2.58           | -12.08 – -2.97            | -3.20   |                         |                    |
| Fish ID (Intercept)                                                                                                                                                                                      |          |                |                           |         | 90.02                   | 9.49               |
| Fish ID (O <sub>2</sub> )                                                                                                                                                                                |          |                |                           |         | 6.53                    | 2.56               |
| Group                                                                                                                                                                                                    |          |                |                           |         | 4.78 x 10 <sup>-6</sup> | 0.00               |

1047

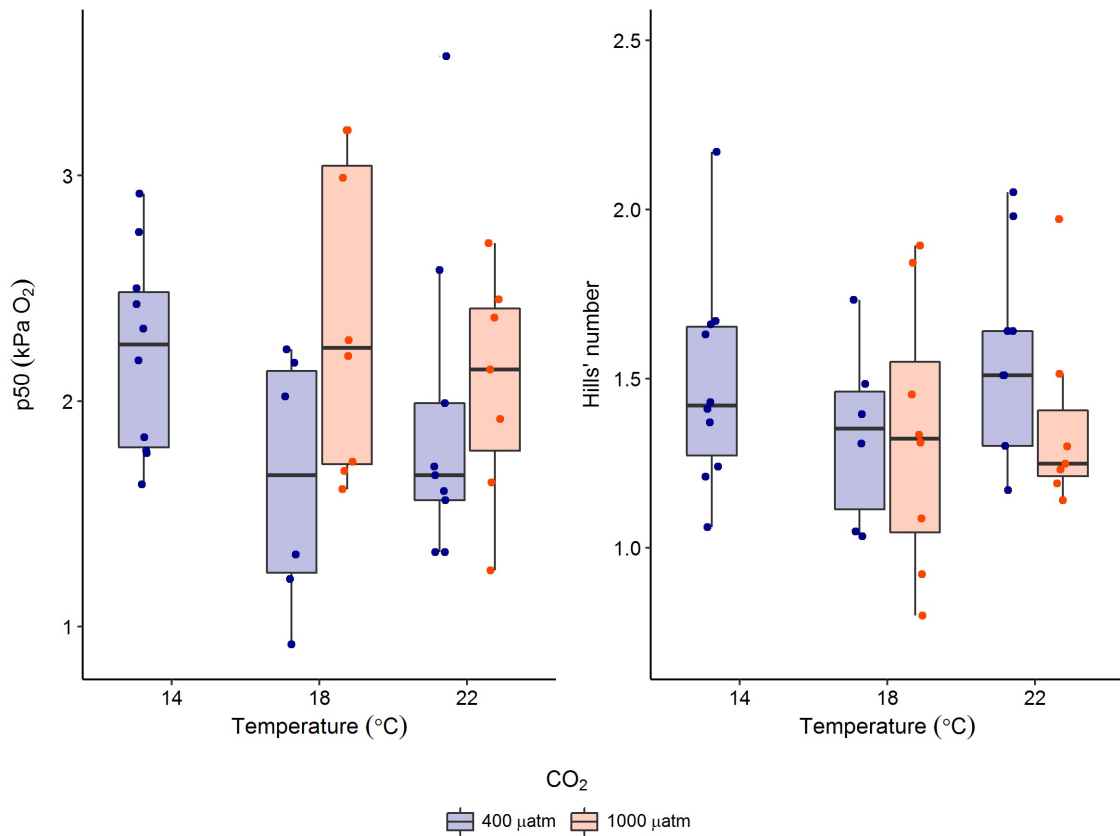

1048

1049 **Figure S1:** No impacts of temperature and CO<sub>2</sub> were observed for  
1050 measurements of haemoglobin-O<sub>2</sub> binding affinity (measured using P<sub>50</sub>) and  
1051 Hill's' number. Due to an equipment failure no measurements were possible  
1052 during the original experimental period for fish at 14 °C exposed to ~1000 μatm  
1053 CO<sub>2</sub>.

1054

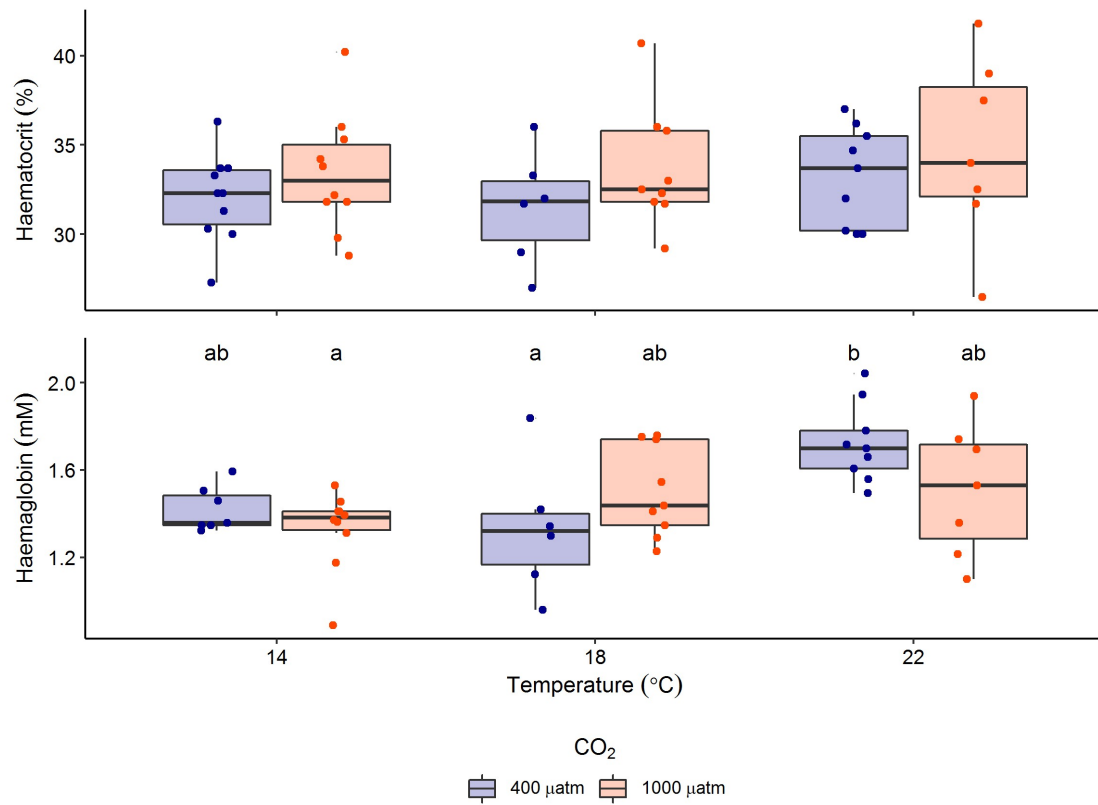

1055

1056 **Figure S2:** Impact of temperature and CO<sub>2</sub> on haematological parameters of  
1057 sea bass. No significant difference in haematocrit were observed between any  
1058 treatments. Significant difference in haemoglobin content were noted between  
1059 fish sampled at different temperature and CO<sub>2</sub> treatments and are represented  
1060 by different lower case letters.

1061
